# Supplementary material for: Ethers as hydrogen sources in BF3·OEt2 promoted reduction of diphenylmethyl alcohols, ethers and esters to hydrocarbons
Source: Royal Society of Chemistry journal article supplement (doi:10.1039/c5ra14775a), 2015-01-01

## Supporting Information

### **Ethers as Hydrogen Sources in $\text{BF}_3 \cdot \text{OEt}_2$ Promoted Reduction of Diphenylmethyl Alcohols, Ethers and Esters to Hydrocarbons**

Jiaqiang Li,<sup>a</sup> Qing Liu,<sup>a</sup> Hang Shen,<sup>a</sup> Ruofeng Huang,<sup>a</sup> Xiaohui

Zhang,<sup>a</sup> Yan Xiong<sup>\*ab</sup> and Changguo Chen<sup>\*a</sup>

<sup>a</sup> School of Chemistry and Chemical Engineering, Chongqing University, Chongqing 400044, China

<sup>b</sup> Chongqing Institute of Green and Intelligent Technology, Chinese Academy of Science, Chongqing  
400714, China

(Email: xiong@cqu.edu.cn; cgchen@cqu.edu.cn)

## **Tabele of Contents**

|                                                                               |           |
|-------------------------------------------------------------------------------|-----------|
| <b>1. General information .....</b>                                           | <b>S1</b> |
| <b>2. General experimental procedures.....</b>                                | <b>S1</b> |
| 2.1 Standard procedures under air conditions. ....                            | S1        |
| 2.2 Standard procedures under argon condition. ....                           | S1        |
| 2.3 General procedures of deuterated experiment.....                          | S2        |
| 2.4 general procedures for preparation substrates by Grignard reaction.....   | S2        |
| <b>3. Experiment data .....</b>                                               | <b>S2</b> |
| <b>4. Characterization data for all products.....</b>                         | <b>S4</b> |
| <b>5. <math>^1\text{H}</math> and <math>^{13}\text{C}</math> spectra.....</b> | <b>S9</b> |

## 1. General information

All reactions were carried out under an inert atmosphere of argon unless otherwise noted. All solvents were distilled from deep purple sodium benzophenone ketyl. Commercial reagents were purchased from the suppliers and used without further purification, unless otherwise noted. Liquid reagents were transferred with stainless steel syringes. NMR spectra were recorded on a 500 spectrometer (500 MHz for  $^1\text{H}$ , 125 MHz for  $^{13}\text{C}$ ) with deuterated chloroform ( $\text{CDCl}_3$ ) as a solvent at 20-25  $^\circ\text{C}$ .  $^1\text{H}$  NMR spectra were reported in parts per million using TMS ( $\delta = 0.00$  ppm) as an internal standard.  $^{13}\text{C}$  NMR spectra were reported in parts per million using solvent  $\text{CDCl}_3$  ( $\delta = 77.2$  ppm) as an internal standard. High-resolution mass spectra (HRMS) atmospheric pressure chemical ionization (APCI) was carried out on a UPLC-Q-ToF MS spectrometer. Unless otherwise specified, column chromatography and thin-layer chromatography (TLC) which was used to monitor the reactions were performed on silica gel.

## 2. General experimental procedures

### 2.1 Standard procedures under air conditions.

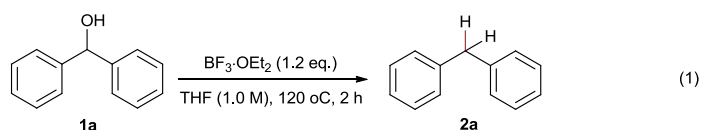

To a round-bottom flask, diphenylmethanol (**1a**, 184.2 mg, 1.0 mmol),  $\text{BF}_3 \cdot \text{OEt}_2$  (151.4  $\mu\text{L}$ , 1.2 mmol) and 1.0 mL of THF were added. Then the resulting mixture was stirred under open-flask condition at 120  $^\circ\text{C}$  (oil bath temp.) for 2 h. The solvent was evaporated, and the residue was chromatographed on silica gel (eluent: petroleum ether) to give colorless diphenylmethane (**2a**, 30.5 mg, 18% yield).

### 2.2 Standard procedures under argon condition.

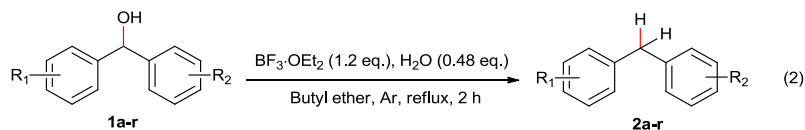

To a three-necked flask, diphenylmethanols (**1**, 1.0 mmol),  $\text{H}_2\text{O}$  (8.64  $\mu\text{L}$ , 0.48 mmol), 1.0 mL of distilled butyl ether and  $\text{BF}_3 \cdot \text{OEt}_2$  (151.4  $\mu\text{L}$ , 1.2 mmol) were added successively. Then the resulting mixture was stirred under an argon atmosphere at 160  $^\circ\text{C}$  (oil bath temp.) for 2 h. The solvent was evaporated, and the residue was chromatographed on silica gel (eluent: petroleum ether) to give desired products (**2**). (For all the yields, please see the main text.)

## 2.3 General procedures of deuterated experiment

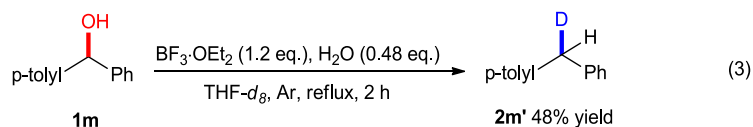

To a three-necked flask, alcohols (**1m**) (1.0 mmol), H<sub>2</sub>O (8.64  $\mu$ L, 0.48 mmol), 1.0 mL of deuterated THF and BF<sub>3</sub> OEt<sub>2</sub> (151.4  $\mu$ L, 1.2 mmol) were added. Then the resulting mixture was stirred under an argon atmosphere at 120 °C (oil bath temp.) for 2 h. The solvent was evaporated, and the residue was chromatographed on silica gel (eluent: petroleum ether) to give colorless liquid (**2m'**) with 48% yield.

## 2.4 General procedures for preparation substrates by Grignard reaction

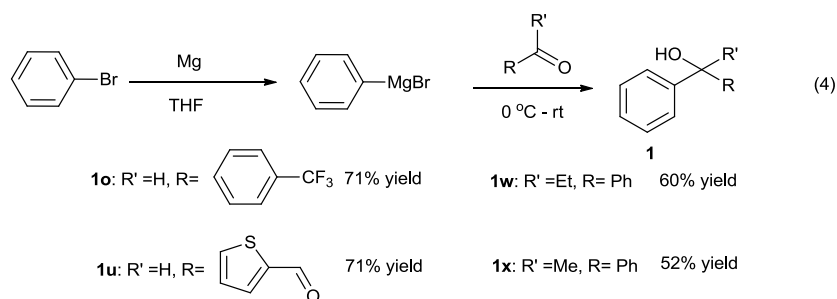

To a three-necked flask, magnesium (7.0 mmol), distilled THF (6 mL) and bromobenzene (5 mmol) were added under argon atmosphere. After stirring for 1 h, aldehyde (5 mmol) were added dropwisely to the prepared phenyl magnesium bromide in Ar atmosphere at 0 °C, and stirred at room temperature overnight. Then the reaction was quenched by saturated NH<sub>4</sub>Cl (aq.), extracted by EtOAc, dried over MgSO<sub>4</sub>, evaporated in vacuum, and further purified by flash chromatography on silica gel with petroleum ether/EtOAc (10:1, v/v) to afford the corresponding alcohols (**1o**, **1u**, **1w**, and **1x**) with 52-71% yields.

## 3. Experiment data

**Table 1.** Detailed optimization of reaction conditions.<sup>[a]</sup>

| Entry | BF <sub>3</sub> OEt <sub>2</sub> (eq.) | H <sub>2</sub> O (eq.) | T (°C) <sup>[b]</sup> | Solvent | Yield (%) <sup>[c]</sup> |  |
|-------|----------------------------------------|------------------------|-----------------------|---------|--------------------------|--|
| 1     | 1.2                                    | -                      | rt.                   | THF     | 8 <sup>d</sup>           |  |
| 2     | 1.2                                    | -                      | 120                   | THF     | 18 <sup>d</sup>          |  |
| 3     | 1.2                                    | -                      | 120                   | THF     | 53                       |  |
| 4     | 1.2                                    | 0.24                   | 120                   | THF     | 58                       |  |
| 5     | 1.2                                    | 0.36                   | 120                   | THF     | 55                       |  |
| 6     | 1.2                                    | 0.48                   | 120                   | THF     | 62                       |  |

|    |     |      |     |                                 |       |
|----|-----|------|-----|---------------------------------|-------|
| 7  | 1.2 | 0.60 | 120 | THF                             | 52    |
| 8  | 1.2 | 0.72 | 120 | THF                             | 53    |
| 9  | 1.2 | 0.96 | 120 | THF                             | 48    |
| 10 | 0.2 | 0.48 | 120 | THF                             | 20    |
| 11 | 0.6 | 0.48 | 120 | THF                             | 52    |
| 12 | 0.8 | 0.48 | 120 | THF                             | 61    |
| 13 | 1.0 | 0.48 | 120 | THF                             | 63    |
| 14 | 1.5 | 0.48 | 120 | THF                             | 52    |
| 15 | 1.2 | 0.48 | 100 | THF                             | 51    |
| 16 | 1.2 | 0.48 | 120 | THF                             | 62    |
| 17 | 1.2 | 0.48 | 120 | CHCl <sub>3</sub>               | 42    |
| 18 | 1.2 | 0.48 | 120 | CH <sub>2</sub> Cl <sub>2</sub> | 22    |
| 19 | 1.2 | 0.48 | 120 | DME                             | 30    |
| 20 | 1.2 | 0.48 | 120 | Dioxane                         | 22    |
| 21 | 1.2 | 0.48 | 120 | DMF                             | trace |
| 22 | 1.2 | 0.48 | 120 | DMSO                            | 2     |
| 23 | 1.2 | 0.48 | 120 | MTBE                            | /[e]  |
| 24 | 1.2 | 0.48 | 120 | Isopropyl ether                 | /[e]  |
| 25 | 1.2 | 0.48 | 120 | Et <sub>2</sub> O               | 53    |
| 26 | 1.2 | 0.48 | 120 | 2-methyl THF                    | 55    |
| 27 | 1.2 | 0.48 | 80  | Butyl ether                     | 68    |
| 28 | 1.2 | 0.48 | 100 | Butyl ether                     | 80    |
| 29 | 1.2 | 0.48 | 120 | Butyl ether                     | 83    |
| 30 | 1.2 | 0.48 | 140 | Butyl ether                     | 84    |
| 31 | 1.2 | 0.48 | 160 | Butyl ether                     | 87    |

[a] Conditions: **1a** (1.0 mmol), BF<sub>3</sub> OEt<sub>2</sub> (specified), H<sub>2</sub>O (specified), temperature (specified) in solvent (1.0 mL) under argon for 2 h. [b] The temperature of oil bath. [c] Isolated yields. [d] Reactions were conducted under air condition. [e] Complex reaction.

**Table 2.** Preparation of diarylmethanols (**1**) from diarylketones.<sup>[a]</sup>

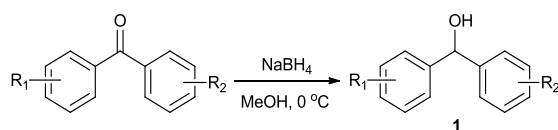

| Ketones | Diarylmethanols | Yield (%) | Ketones | Diarylmethanols | Yield (%) |
|---------|-----------------|-----------|---------|-----------------|-----------|
|         |                 | 99        |         |                 | 99        |
|         |                 | 97        |         |                 | 99        |
|         |                 | 94        |         |                 | 95        |

|                                                                                   |                                                                                   |    |                                                                                   |                                                                                     |    |
|-----------------------------------------------------------------------------------|-----------------------------------------------------------------------------------|----|-----------------------------------------------------------------------------------|-------------------------------------------------------------------------------------|----|
| 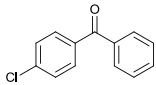 |  | 85 |  |  | 84 |
|  |  | 84 |  |  | 98 |
|  |  | 65 |  |  | 43 |
|  |  | 98 |  |  | 99 |

[a] Conditions: a mixture of ketones (5-10 mmol) and NaBH<sub>4</sub> (1.4 eq.) in 10-20 mL MeOH was stirred at 0 °C for 1-3 hours. Then the residual was extracted with CH<sub>2</sub>Cl<sub>2</sub> and chromatographed on silica gel after the solvent is evaporated.

**Table 3.** Preparation of diarylmethyl ethers (**3**) from diarylmethanols (**1a**).<sup>[a]</sup>

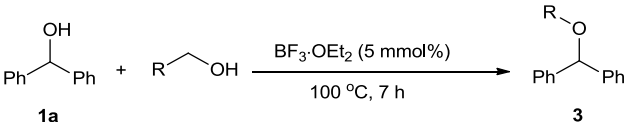

| Alcohols                                                                            | Ethers ( <b>3</b> )                                                                 | Yield (%) | Alcohols                                | Ethers ( <b>3</b> )                                                                   | Yield (%) |
|-------------------------------------------------------------------------------------|-------------------------------------------------------------------------------------|-----------|-----------------------------------------|---------------------------------------------------------------------------------------|-----------|
| MeOH                                                                                |  | 92        | Ph-CH <sub>2</sub> -OH                  |  | 79        |
| EtOH                                                                                |  | 90        | CH <sub>2</sub> =CH-CH <sub>2</sub> -OH |  | 92        |
|  |  | 87        | HO-CH <sub>2</sub> -CH <sub>2</sub> -OH |  | 76        |
|  |  | 94        |                                         |                                                                                       |           |

[a] Conditions: a mixture of **1a** (6-10 mmol) and BF<sub>3</sub>·OEt<sub>2</sub> (5 mol%) in 6-10 mL **5** was stirred under 100 °C for 7 hours. Then the residual was chromatographed on silica gel after the solvent is evaporated.

#### 4. Characterization data for all products

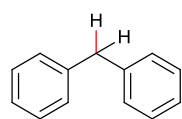

**Diphenylmethane (2a)**

Colorless liquid; 146.5 mg, 87% yield; <sup>1</sup>H NMR (500 MHz, CDCl<sub>3</sub>) δ 7.27 (t, *J* = 8.0 Hz, 4H), 7.21-7.17 (m, 6H), 3.97 (s, 2H); <sup>13</sup>C NMR (125 MHz, CDCl<sub>3</sub>) δ 141.3, 129.1, 128.6, 126.2, 42.1; HRMS (APCI) calcd for C<sub>13</sub>H<sub>12</sub> [M + H]<sup>+</sup> 169.1017, found 169.1019.

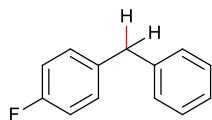

#### 4-Fluorodiphenylmethane (2b)

Colorless liquid; 174.0 mg, 93% yield;  $^1\text{H}$  NMR (500 MHz,  $\text{CDCl}_3$ )  $\delta$  7.27 (d,  $J = 7.0$  Hz, 2H), 7.19 (t,  $J = 7.5$  Hz, 1H), 7.16-7.11 (m, 4H), 6.95 (t,  $J = 8.5$  Hz, 2H), 3.94 (s, 2H);  $^{13}\text{C}$  NMR (125 MHz,  $\text{CDCl}_3$ )  $\delta$  161.6 (d,  $J = 245.3$  Hz), 141.1, 136.9 (d,  $J = 3.1$  Hz), 130.4 (d,  $J = 7.75$  Hz), 129.0, 128.7, 126.3, 115.4 (d,  $J = 21.0$  Hz), 41.3; HRMS (APCI) calcd for  $\text{C}_{13}\text{H}_{11}\text{F}$   $[\text{M} + \text{H}]^+$  187.0923, found 187.0912.

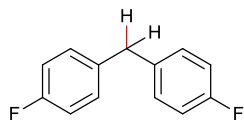

#### 4, 4'-Difluorodiphenylmethane (2c)

Colorless liquid; 171.1 mg, 84% yield;  $^1\text{H}$  NMR (500 MHz,  $\text{CDCl}_3$ )  $\delta$  7.11 (t,  $J = 6.0$  Hz, 4H), 6.97 (t,  $J = 8.5$  Hz, 4H), 3.91 (s, 2H);  $^{13}\text{C}$  NMR (125 MHz,  $\text{CDCl}_3$ )  $\delta$  161.6 (d,  $J = 242.8$  Hz), 136.7 (d,  $J = 3.0$  Hz), 130.4 (d,  $J = 7.9$  Hz), 115.5 (d,  $J = 21.1$  Hz), 40.4; HRMS (APCI) calcd for  $\text{C}_{13}\text{H}_{10}\text{F}_2$   $[\text{M} + \text{H}]^+$  205.0829, found 205.0835.

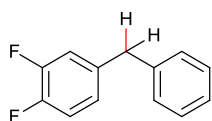

#### 3, 4 -Difluorodiphenylmethane (2d)

Colorless liquid; 184.6 mg, 90% yield;  $^1\text{H}$  NMR (500 MHz,  $\text{CDCl}_3$ )  $\delta$  7.31-7.29 (m, 2H), 7.23-7.21 (m, 1H), 7.16-7.15 (m, 2H), 7.08-7.02 (m, 1H), 6.98-6.93 (m, 1H), 6.90-6.88 (m, 1H), 3.92 (s, 2H);  $^{13}\text{C}$  NMR (125 MHz,  $\text{CDCl}_3$ )  $\delta$  150.5 (dd,  $J_1 = 246.9$  Hz,  $J_2 = 12.8$  Hz), 149.1 (dd,  $J_1 = 244.6$  Hz,  $J_2 = 12.4$  Hz), 140.3, 138.3 (t,  $J = 4.3$  Hz), 129.0, 128.8, 126.7, 124.8 (t,  $J = 2.5$  Hz), 117.8 (d,  $J = 16.9$  Hz), 117.2 (d,  $J = 17.0$  Hz), 41.2; HRMS (APCI) calcd for  $\text{C}_{13}\text{H}_{10}\text{F}_2$   $[\text{M} - \text{H}]^-$  205.0829, found 203.0816.

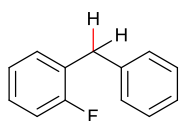

#### 2-Fluorodiphenylmethane (2e)

Colorless liquid; 134.8 mg, 72% yield;  $^1\text{H}$  NMR (500 MHz,  $\text{CDCl}_3$ )  $\delta$  7.28 (t,  $J = 7.5$  Hz, 2H), 7.22-7.17 (m, 4H), 7.13 (t,  $J = 9.5$  Hz, 1H), 7.05-7.00 (m, 2H), 3.99 (s, 2H);  $^{13}\text{C}$  NMR (125 MHz,  $\text{CDCl}_3$ )  $\delta$  161.1 (d,  $J = 243.8$  Hz), 140.0, 131.2 (d,  $J = 4.3$  Hz), 129.0, 128.7, 128.3, 128.1 (d,  $J = 8.0$  Hz), 126.4, 124.2 (d,  $J = 2.9$  Hz), 115.5 (d,  $J = 21.9$  Hz), 35.0; HRMS (APCI) calcd for  $\text{C}_{13}\text{H}_{11}\text{F}$   $[\text{M} + \text{H}]^+$  187.0923, found 187.0913.

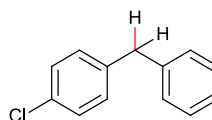

#### 4-Chlorodiphenylmethane (2f)

Colorless liquid; 172.3 mg, 85% yield;  $^1\text{H}$  NMR (500 MHz,  $\text{CDCl}_3$ )  $\delta$  7.29 (t,  $J = 7.0$  Hz, 2H), 7.24 (d,  $J = 8.5$  Hz, 2H), 7.21 (t,  $J = 7.0$  Hz, 1H), 7.16 (d,  $J = 7.5$  Hz, 2H), 7.11 (d,  $J = 8.5$  Hz, 2H); 3.94 (s, 2H);  $^{13}\text{C}$  NMR (125 MHz,  $\text{CDCl}_3$ )  $\delta$  140.7, 139.8, 132.1, 130.4, 129.0, 128.7, 126.5, 41.4; HRMS (APCI) calcd for  $\text{C}_{13}\text{H}_{11}\text{Cl}$   $[\text{M} + \text{H}]^+$  203.0628, found 203.0612.

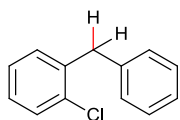

#### 2-Chlorodiphenylmethane (2g)

Colorless liquid; 141.5 mg, 70% yield;  $^1\text{H}$  NMR (500 MHz,  $\text{CDCl}_3$ )  $\delta$  7.37-7.35 (m, 1H), 7.29-7.26 (m, 2H), 7.21-7.13 (m, 6H), 4.10 (s, 2H);  $^{13}\text{C}$  NMR (125 MHz,  $\text{CDCl}_3$ )  $\delta$  139.7, 138.9, 134.4, 131.2, 129.7, 129.1, 128.6, 127.8, 127.0, 126.4, 39.4; HRMS (APCI) calcd for  $\text{C}_{13}\text{H}_{11}\text{Cl}$   $[\text{M} + \text{H}]^+$  203.0628, found 203.0626.

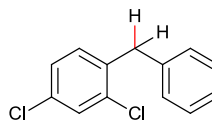

#### 2, 4-Dichlorodiphenylmethane (2h)

Colorless liquid; 124.4 mg, 53% yield;  $^1\text{H}$  NMR (500 MHz,  $\text{CDCl}_3$ )  $\delta$  7.39, (d,  $J = 2.0$  Hz, 1H), 7.29, (t,  $J = 7.5$  Hz, 2H), 7.22 (t,  $J = 7.0$  Hz, 1H), 7.17-7.14 (m, 3H), 7.05 (d,  $J = 8.5$  Hz, 1H), 4.05 (s, 2H);  $^{13}\text{C}$  NMR (125 MHz,  $\text{CDCl}_3$ )  $\delta$  139.1, 137.5, 135.0, 132.8, 131.9, 129.4, 129.1, 128.8, 127.3, 126.6, 38.8; HRMS (APCI) calcd for  $\text{C}_{13}\text{H}_{10}\text{Cl}_2$   $[\text{M} + \text{H}]^+$  237.0238, found 237.0244.

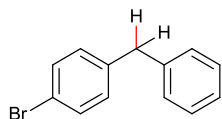

#### 4-Bromodiphenylmethane (2i)

Colorless liquid; 231.9 mg, 94% yield;  $^1\text{H}$  NMR (500 MHz,  $\text{CDCl}_3$ )  $\delta$  7.39 (d,  $J = 8.0$  Hz, 2H), 7.28 (t,  $J = 7.0$  Hz, 2H), 7.20 (t,  $J = 7.5$  Hz, 1H), 7.15 (d,  $J = 8.0$  Hz, 2H), 7.04 (d,  $J = 8.5$  Hz, 2H); 3.91 (s, 2H);  $^{13}\text{C}$  NMR (125 MHz,  $\text{CDCl}_3$ )  $\delta$  140.6, 140.3, 131.7, 130.8, 129.0, 128.7, 126.5, 120.1, 41.5; HRMS (APCI) calcd for  $\text{C}_{13}\text{H}_{11}\text{Br}$   $[\text{M} + \text{H}]^+$  247.0122, found 247.0107.

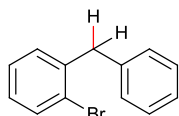

#### 2-Bromodiphenylmethane (2j)

Colorless liquid; 173.0 mg, 70% yield;  $^1\text{H}$  NMR (500 MHz,  $\text{CDCl}_3$ )  $\delta$  7.55 (d,  $J = 8.0$  Hz, 1H), 7.28 (t,  $J = 7.5$  Hz, 2H), 7.22-7.17 (m, 4H), 7.12 (d,  $J = 7.0$  Hz, 1H), 7.06 (t,  $J = 7.0$  Hz, 1H); 4.11 (s, 2H);  $^{13}\text{C}$  NMR (125 MHz,  $\text{CDCl}_3$ )  $\delta$  140.5, 139.7, 133.0, 131.3, 129.2, 128.7, 128.1, 127.6, 126.4, 125.1, 41.9; HRMS (APCI) calcd for  $\text{C}_{13}\text{H}_{11}\text{Br}$   $[\text{M} + \text{H}]^+$  247.0122, found 247.0120.

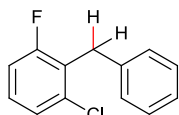

#### 1-Chloro-6-fluorodiphenylmethane (2k)

Colorless liquid; 149.5 mg, 68% yield;  $^1\text{H}$  NMR (500 MHz,  $\text{CDCl}_3$ )  $\delta$  7.27-7.25, (m, 4H), 7.18, (d,  $J = 8.0$  Hz, 2H), 7.15-7.10 (m, 1H), 6.98 (t,  $J = 9.0$  Hz, 1H), 4.15 (s, 2H);  $^{13}\text{C}$  NMR (125 MHz,  $\text{CDCl}_3$ )  $\delta$  161.7 (d,  $J = 246.3$  Hz), 138.9, 135.6 (d,  $J = 5.8$  Hz), 128.7, 128.6, 128.3 (d,  $J = 9.5$  Hz), 127.1 (d,  $J = 18.6$  Hz), 126.5, 125.5 (d,  $J = 3.4$  Hz), 114.2 (d,  $J = 22.9$  Hz), 32.2 (d,  $J = 2.6$  Hz); HRMS (APCI) calcd for  $\text{C}_{13}\text{H}_{10}\text{ClF}$   $[\text{M} + \text{H}]^+$  221.0533, found 221.0531.

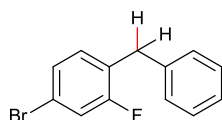

#### 2-Fluoro-4-bromodiphenylmethane (2l)

Colorless liquid; 155.1 mg, 59% yield;  $^1\text{H}$  NMR (500 MHz,  $\text{CDCl}_3$ )  $\delta$  7.27, (t,  $J = 6.5$  Hz, 2H), 7.21-7.16, (m, 5H), 6.98 (t,  $J = 8.0$ , 1H), 3.92 (s, 2H);  $^{13}\text{C}$  NMR (125 MHz,  $\text{CDCl}_3$ )  $\delta$  160.9 (d,  $J = 248.6$  Hz), 139.3, 132.2 (d,  $J = 5.0$  Hz), 128.9, 128.8, 127.5 (d,  $J = 3.4$  Hz), 127.4, 126.6, 120.2 (d,  $J = 9.5$  Hz), 119.1 (d,  $J = 25.4$  Hz), 34.6; HRMS (APCI) calcd for  $\text{C}_{13}\text{H}_{10}\text{BrF}$   $[\text{M} + \text{H}]^+$  265.0028, found 265.0033.

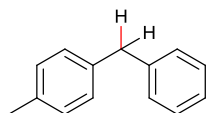

#### 4-Methyl-diphenylmethane (2m)

Colorless liquid; 168.8 mg, 93% yield;  $^1\text{H}$  NMR (500 MHz,  $\text{CDCl}_3$ )  $\delta$  7.26 (t,  $J = 7.5$  Hz, 2H), 7.20-7.17 (m, 3H), 7.10-7.06 (m, 4H), 3.93 (s, 2H), 2.30 (s 3H);  $^{13}\text{C}$  NMR (125 MHz,  $\text{CDCl}_3$ )  $\delta$  141.6, 138.2, 135.7, 129.3, 129.04, 128.98, 128.6, 126.1, 41.7, 21.2; HRMS (APCI) calcd for  $\text{C}_{14}\text{H}_{14}$   $[\text{M} + \text{H}]^+$  183.1174, found 183.1177.

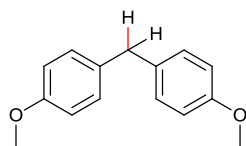

#### 3,4-Difluorodiphenylmethane (2n)

Yellow liquid; 54.0 mg, 24% yield;  $^1\text{H}$  NMR (500 MHz,  $\text{CDCl}_3$ )  $\delta$  7.08 (d,  $J = 7.5$  Hz, 4H), 6.82 (d,  $J = 7.0$ , 4H), 3.86 (s, 2H), 3.77 (s, 6H);  $^{13}\text{C}$  NMR



(125 MHz, CDCl<sub>3</sub>)  $\delta$  158.1, 133.9, 129.9, 114.0, 55.4, 40.3; HRMS (APCI) calcd for C<sub>15</sub>H<sub>16</sub>O<sub>2</sub> [M + H]<sup>+</sup> 229.1229, found 229.1214.

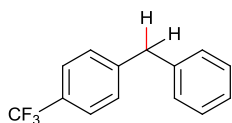

#### 4-Trifluoromethyldiphenylmethane (2o)

Colorless liquid; 70.0 mg, 30% yield; <sup>1</sup>H NMR (500 MHz, CDCl<sub>3</sub>)  $\delta$  7.53 (d, *J* = 8.0 Hz, 2H), 7.32-7.28 (m, 4H), 7.22 (t, *J* = 7.0 Hz, 1H), 7.17 (d, *J* = 7.5 Hz, 2H), 4.03 (s, 2H); <sup>13</sup>C NMR (125 MHz, CDCl<sub>3</sub>)  $\delta$  145.4, 140.2, 129.4, 129.1, 128.9, 128.5, 126.7, 125.6 (m), 123.4, 41.9; HRMS (APCI) calcd for C<sub>14</sub>H<sub>11</sub>F<sub>3</sub> [M]<sup>+</sup> 236.0813, found 236.0809.

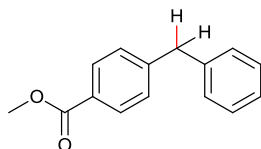

#### Diphenylmethane-4-carboxylic acid methyl ester (2p)

Yellow liquid; 90.0 mg, 40% yield; <sup>1</sup>H NMR (500 MHz, CDCl<sub>3</sub>)  $\delta$  7.95 (d, *J* = 8.5 Hz, 2H), 7.29 (t, *J* = 7.0 Hz, 2H), 7.25 (d, *J* = 8.5 Hz, 2H), 7.21 (t, *J* = 7.5 Hz, 1H), 7.17 (d, *J* = 7.5 Hz, 2H), 4.02 (s, 2H), 3.89 (s, 3H); <sup>13</sup>C NMR (125 MHz, CDCl<sub>3</sub>)  $\delta$  167.2, 146.7, 140.3, 130.0, 129.1, 128.8, 128.3, 126.5, 52.2, 42.1; HRMS (APCI) calcd for C<sub>15</sub>H<sub>14</sub>O<sub>2</sub> [M + H]<sup>+</sup> 227.1072, found 227.1060.

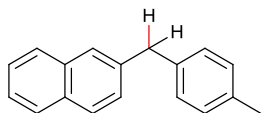

#### 2-(4-Methylbenzyl)naphthalene (2q)

Colorless liquid; 177.0 mg, 76% yield; <sup>1</sup>H NMR (500 MHz, CDCl<sub>3</sub>)  $\delta$  7.78-7.73, (m, 3H), 7.62, (s, 1H), 7.45-7.40 (m, 2H), 7.30 (d, *J* = 8.0 Hz, 1H), 7.12-7.09 (m, 4H), 4.09 (s, 2H), 2.31 (s, 3H); <sup>13</sup>C NMR (125 MHz, CDCl<sub>3</sub>)  $\delta$  139.1, 138.1, 135.8, 133.8, 132.2, 129.4, 129.1, 128.2, 127.81, 127.79, 127.7, 127.2, 126.1, 125.5, 41.9, 21.2; HRMS (APCI) calcd for C<sub>18</sub>H<sub>16</sub> [M + H]<sup>+</sup> 233.1330, found 233.1334.

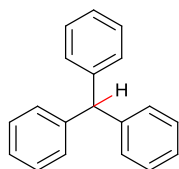

#### Triphenylmethane (2r/2s)

Colorless liquid; 234.0 mg, 95% yield (**2p**); 222.9 mg, 91% yield (**2q**); <sup>1</sup>H NMR (500 MHz, CDCl<sub>3</sub>)  $\delta$  7.28 (t, *J* = 7.5 Hz, 6H), 7.20 (t, *J* = 7.5 Hz, 3H), 7.11 (d, *J* = 7.0, 6H), 5.55 (s, 1H); <sup>13</sup>C NMR (125 MHz, CDCl<sub>3</sub>)  $\delta$  144.1, 129.6, 128.5, 126.5, 57.0; HRMS (APCI) calcd for C<sub>19</sub>H<sub>16</sub> [M + H]<sup>+</sup> 245.1330, found 245.1330.

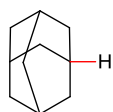

#### Adamantine (2t)

White solid 40.1 mg, 29% yield; <sup>1</sup>H NMR (500 MHz, CDCl<sub>3</sub>)  $\delta$  1.87 (s, 4H), 1.75 (t, *J* = 3.5 Hz, 12H); <sup>13</sup>C NMR (125 MHz, CDCl<sub>3</sub>)  $\delta$  38.0, 28.5.

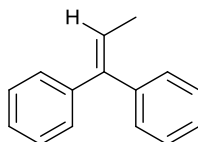

#### Prop-1-ene-1,1-diyl dibenzene (2w)

White solid; 99% yield (**2w**); <sup>1</sup>H NMR (500 MHz, CDCl<sub>3</sub>)  $\delta$  7.37 (t, *J* = 8.0 Hz, 2H), 7.30 (t, *J* = 7.5 Hz, 1H), 7.25 (t, *J* = 7.5, 2H), 7.22-7.18 (m, 5H), 6.17 (q, *J* = 7.0 Hz, 1H), 1.76 (d, *J* = 7.0 Hz, 3H); <sup>13</sup>C NMR (125 MHz, CDCl<sub>3</sub>)  $\delta$  143.2, 142.6, 140.2, 130.2, 128.3, 128.2, 127.4, 127.0, 126.9, 124.3, 15.9. HRMS (APCI) calcd for C<sub>15</sub>H<sub>14</sub> [M + H]<sup>+</sup> 195.1174, found 195.1165.

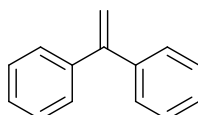

#### Ethene-1,1-diyl dibenzene (2x)

Colorless liquid; 99.0 mg, 55% yield (**2x**);  $^1\text{H}$  NMR (500 MHz,  $\text{CDCl}_3$ )  $\delta$  7.33- 7.26 (m, 10H), 5.46 (s, 2H);  $^{13}\text{C}$  NMR (125 MHz,  $\text{CDCl}_3$ )  $\delta$  150.2, 141.7, 128.4, 128.3, 127.9, 114.5.

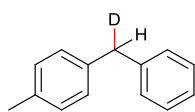

**4-Methyl-diphenylmethane (2m')**

Colorless liquid; 87.0 mg, 48% yield;  $^1\text{H}$  NMR (500 MHz,  $\text{CDCl}_3$ )  $\delta$  7.26 (t,  $J$  = 7.5 Hz, 2H), 7.19-7.16 (m, 3H), 7.10-7.06 (m, 4H), 3.92 (d,  $J$  = 10.0 Hz 1H), 2.30 (s 3H);  $^{13}\text{C}$  NMR (125 MHz,  $\text{CDCl}_3$ )  $\delta$  141.6, 138.2, 135.7, 129.3, 129.04, 128.98, 128.6, 126.2, 41.4 (m), 21.2.

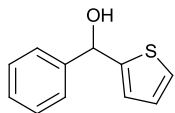

**Phenyl(thiophen-2-yl)methanol (1u)**

Yellow solid;  $^1\text{H}$  NMR (500 MHz,  $\text{CDCl}_3$ )  $\delta$  7.45 (d,  $J$  = 7.0 Hz, 2H), 7.37 (t,  $J$  = 7.0 Hz, 2H), 7.31 (t,  $J$  = 7.5 Hz, 1H), 7.27-7.25 (m, 1H), 6.95-6.93 (m, 1H), 6.88 (d,  $J$  = 3.5 Hz, 1H), 6.05 (d,  $J$  = 3.5 Hz, 1H), 2.44 (d,  $J$  = 4.0 Hz, 1H).

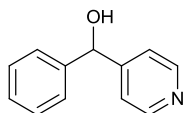

**Phenyl(pyridin-4-yl)methanol (1v)**

White solid;  $^1\text{H}$  NMR (500 MHz,  $\text{CDCl}_3$ )  $\delta$  8.39-8.37 (m, 2H), 7.35-7.32 (m, 4H), 7.31- 7.27 (m, 3H), 5.76 (s, 1H), 4.26 (s, 1H).

## 5. $^1\text{H}$ and $^{13}\text{C}$ spectra

Diphenylmethane (**2a**, 87%).

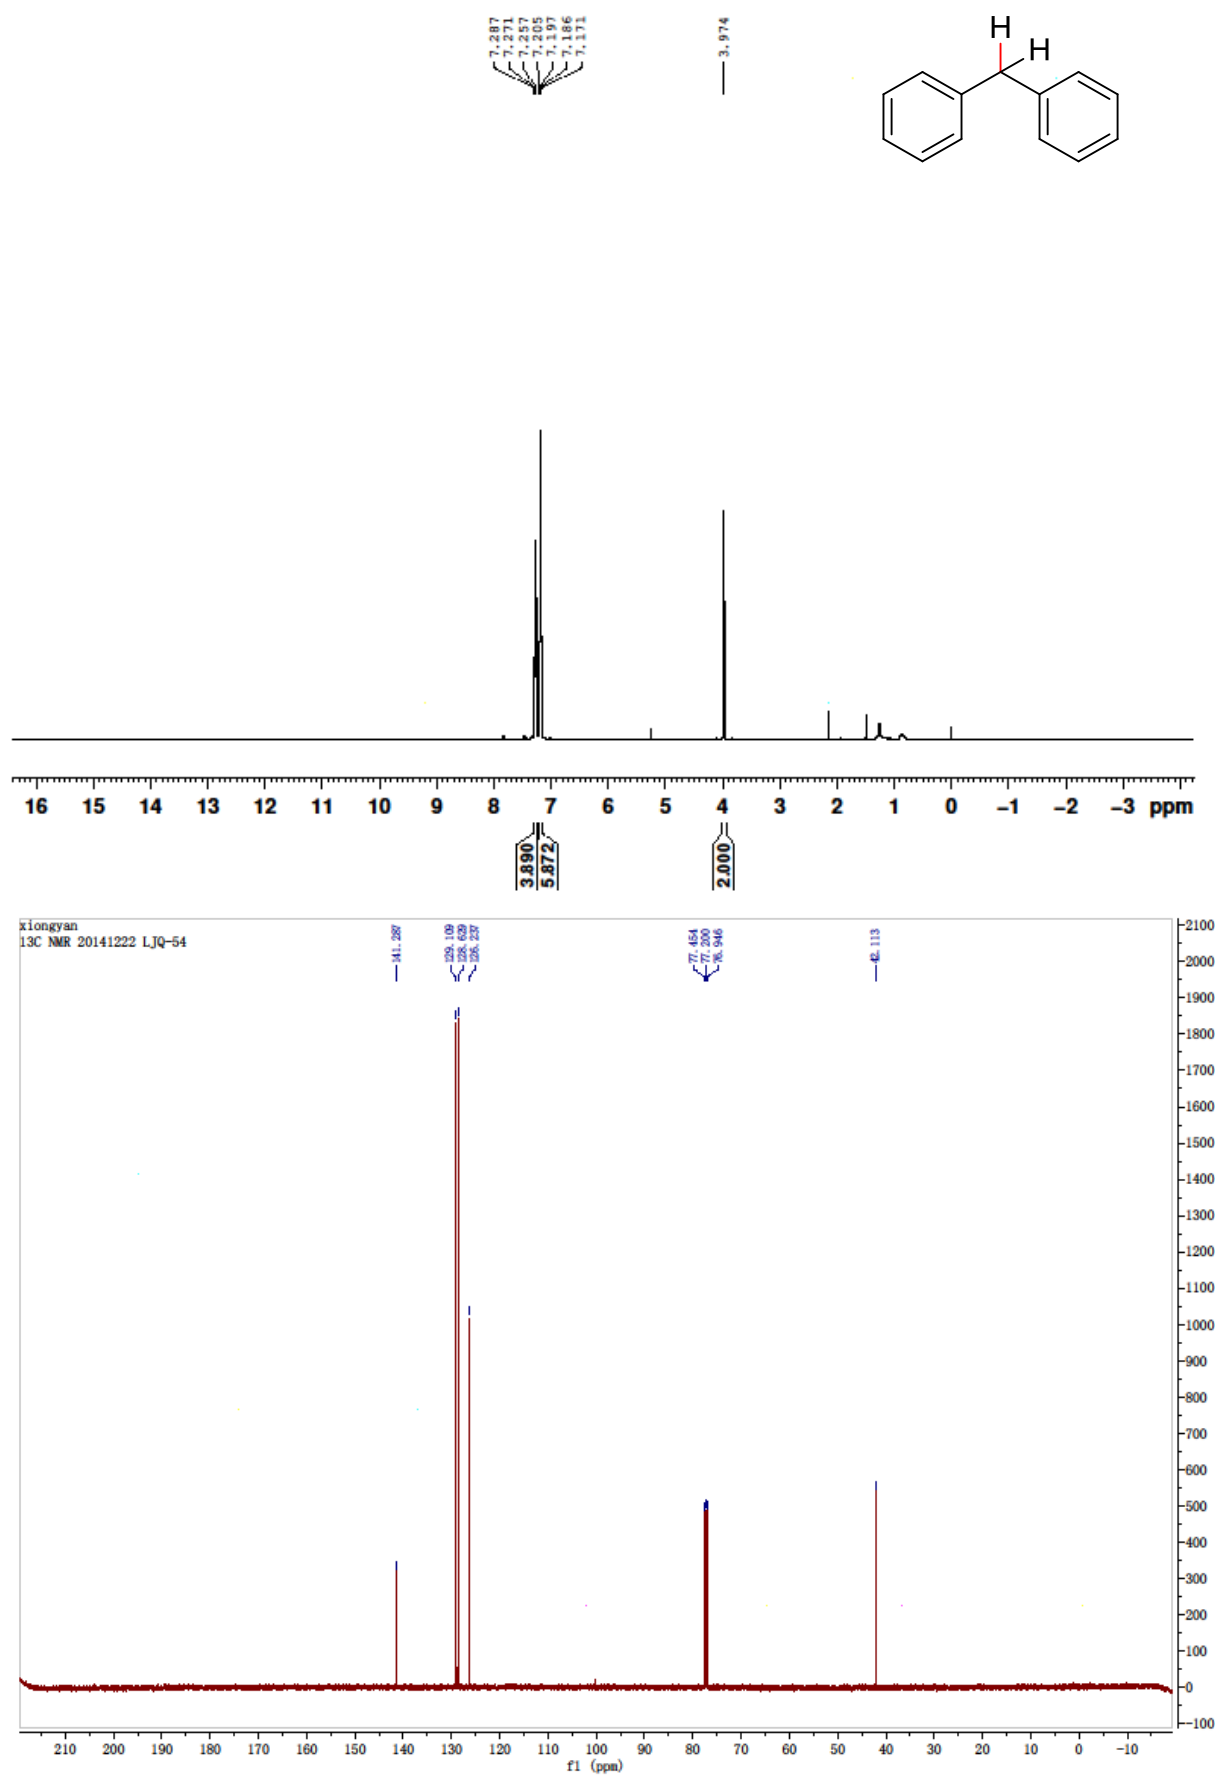

4-Fluorodiphenylmethane (**2b**, 93%)

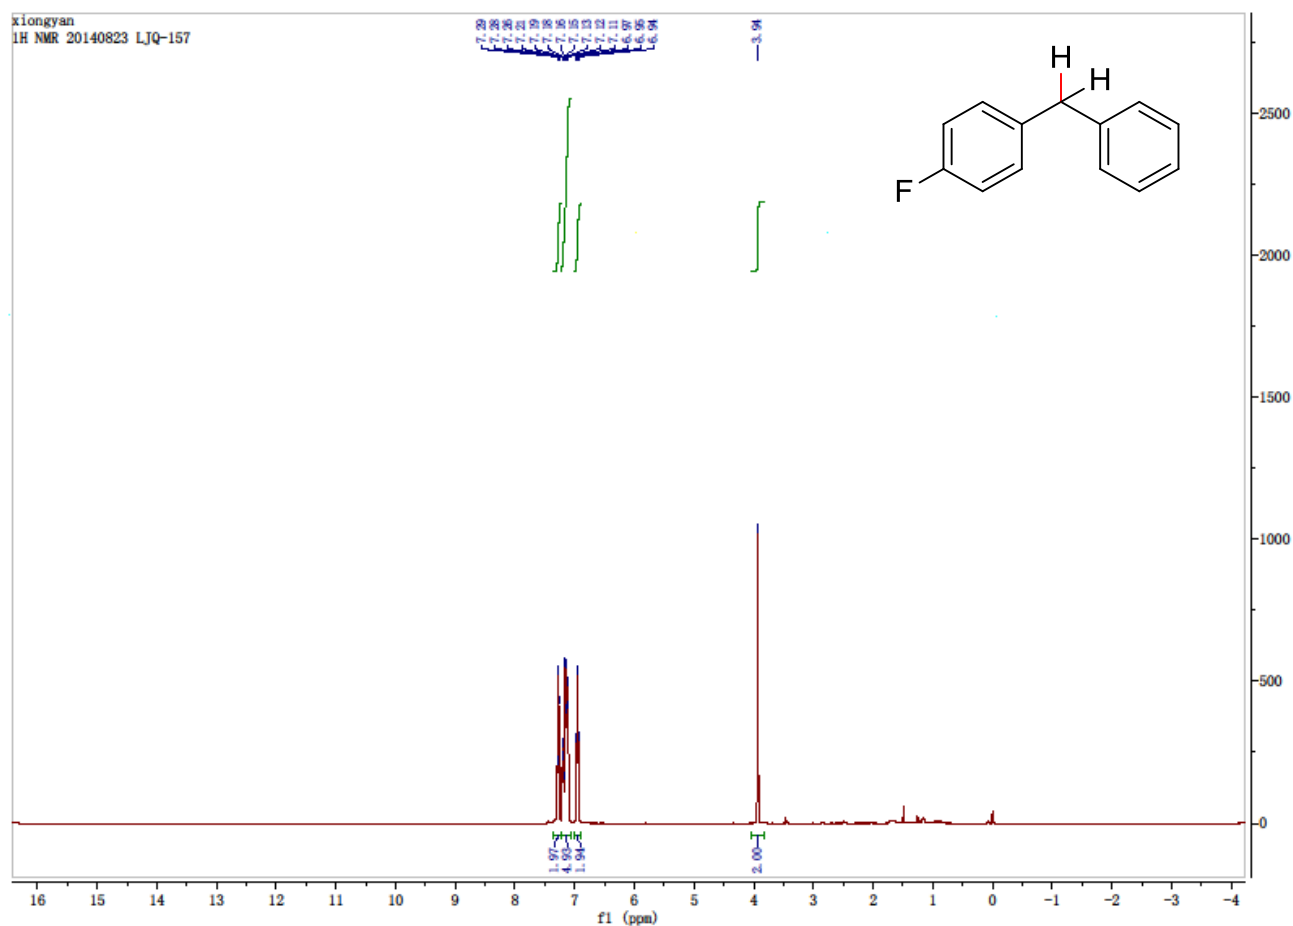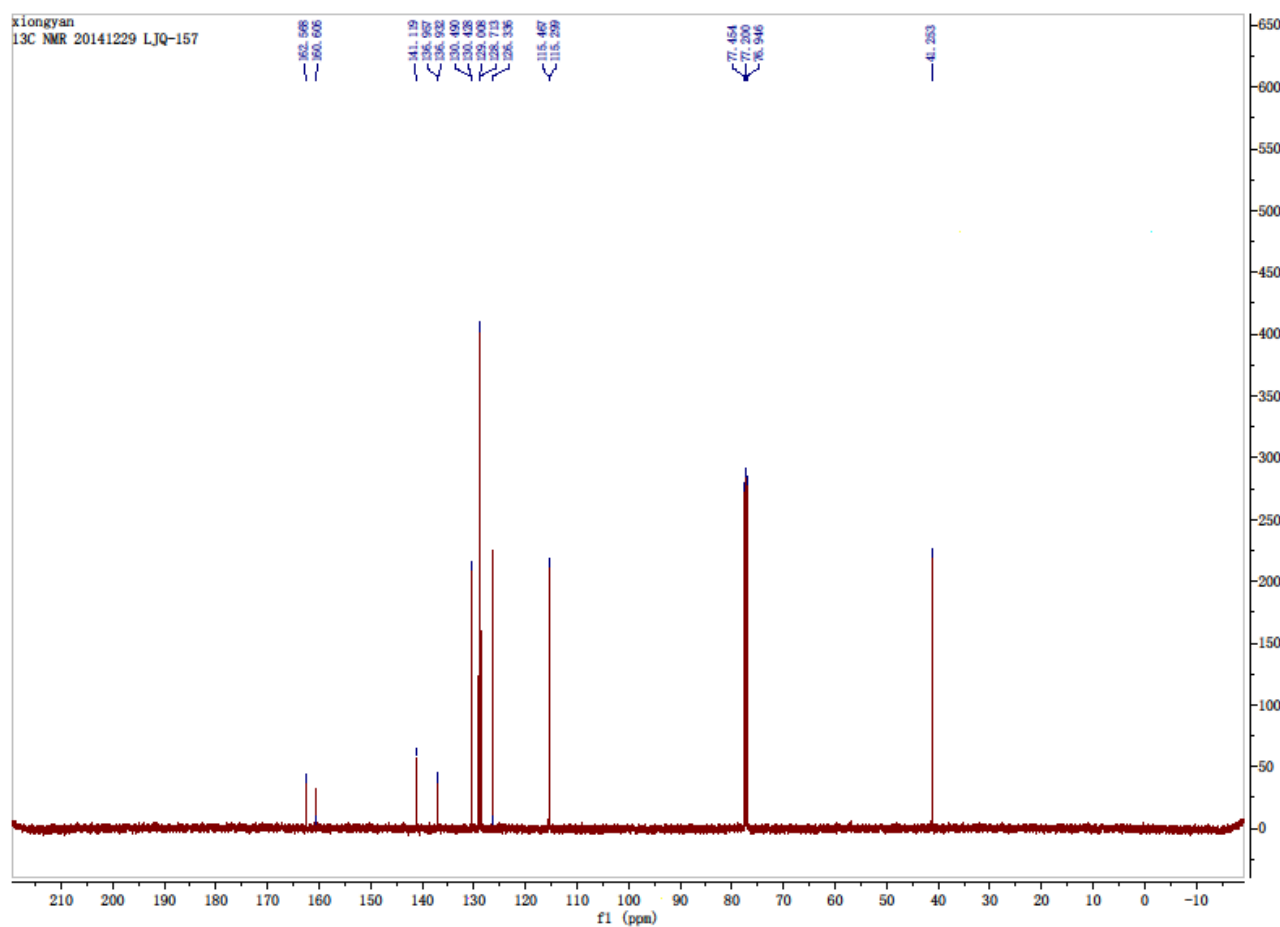

4, 4'-Difluorodiphenylmethane (**2c**, 84%)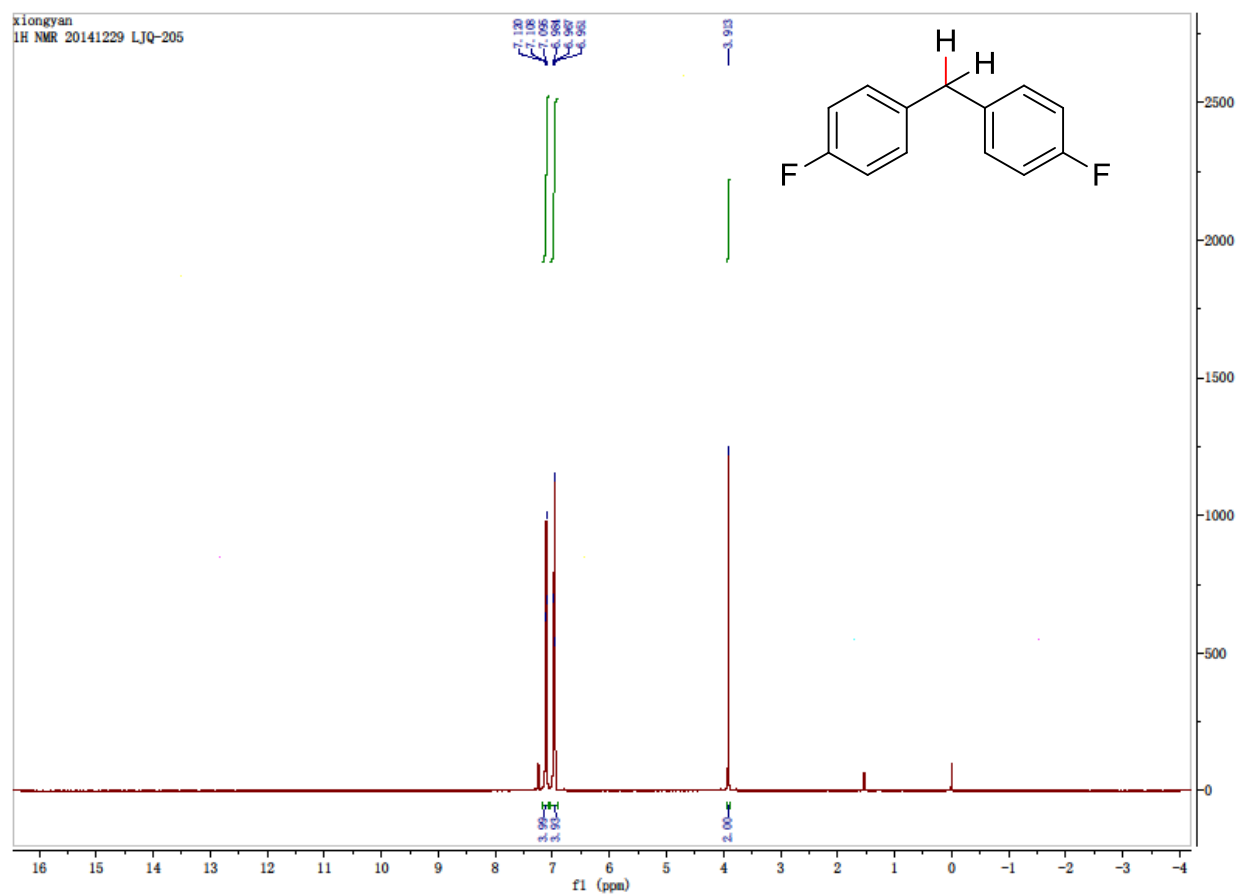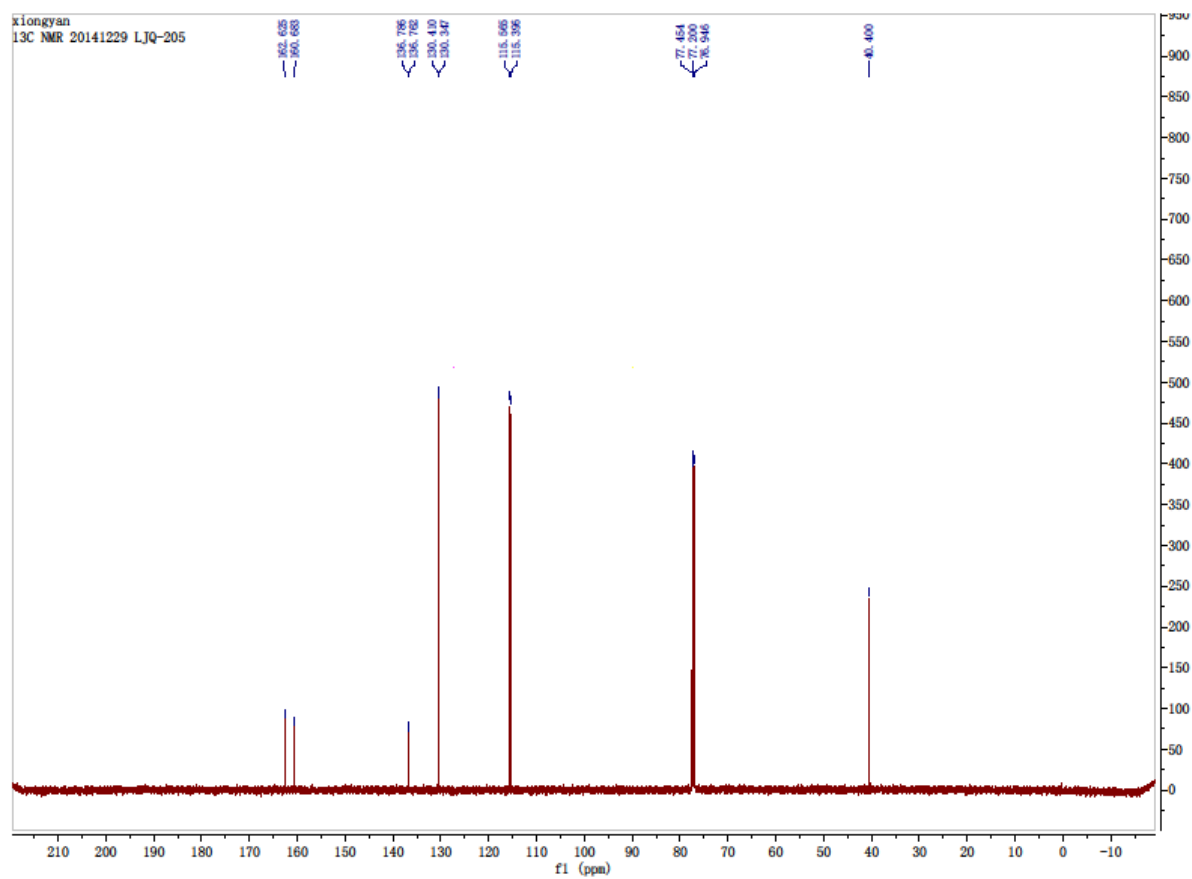

3, 4 -Difluorodiphenylmethane (**2d**, 90%)

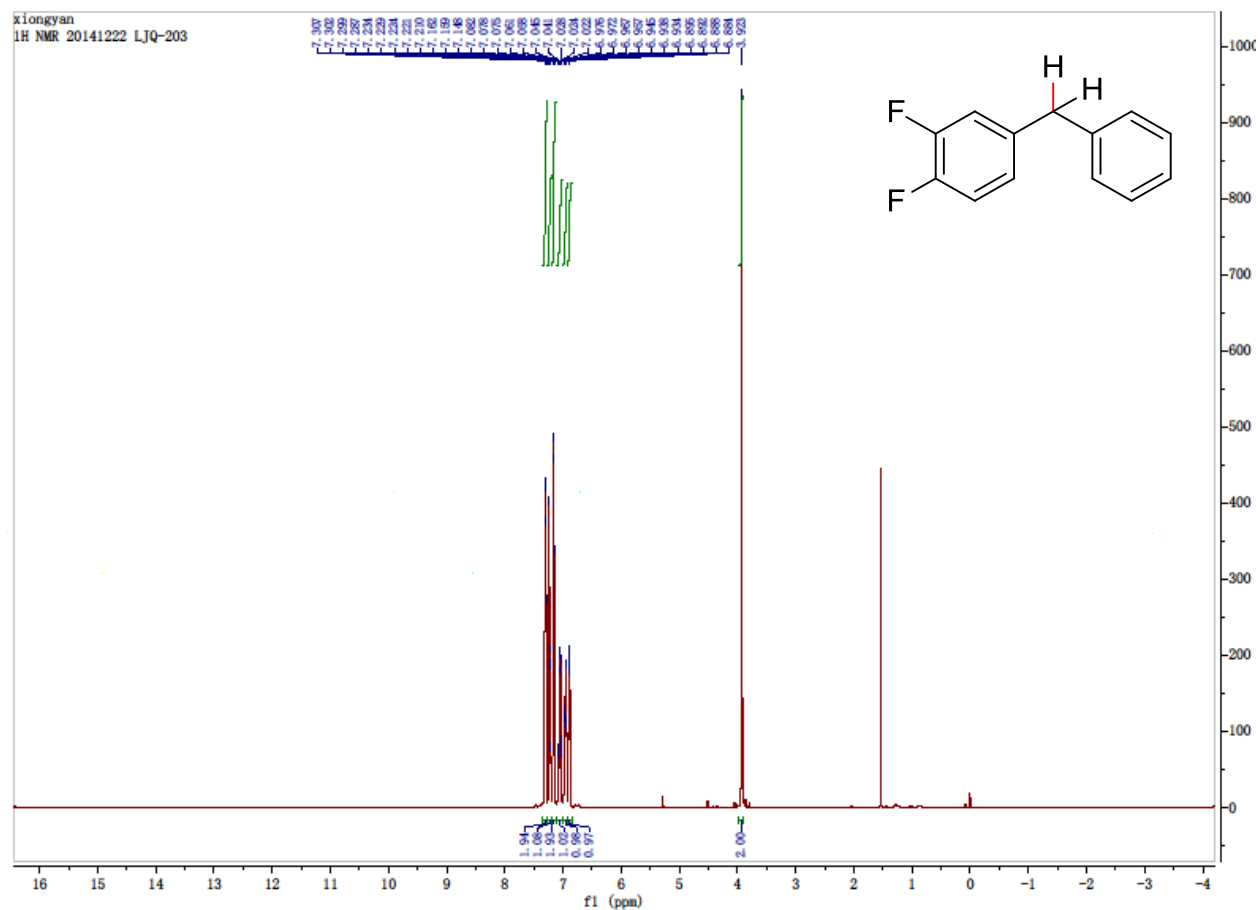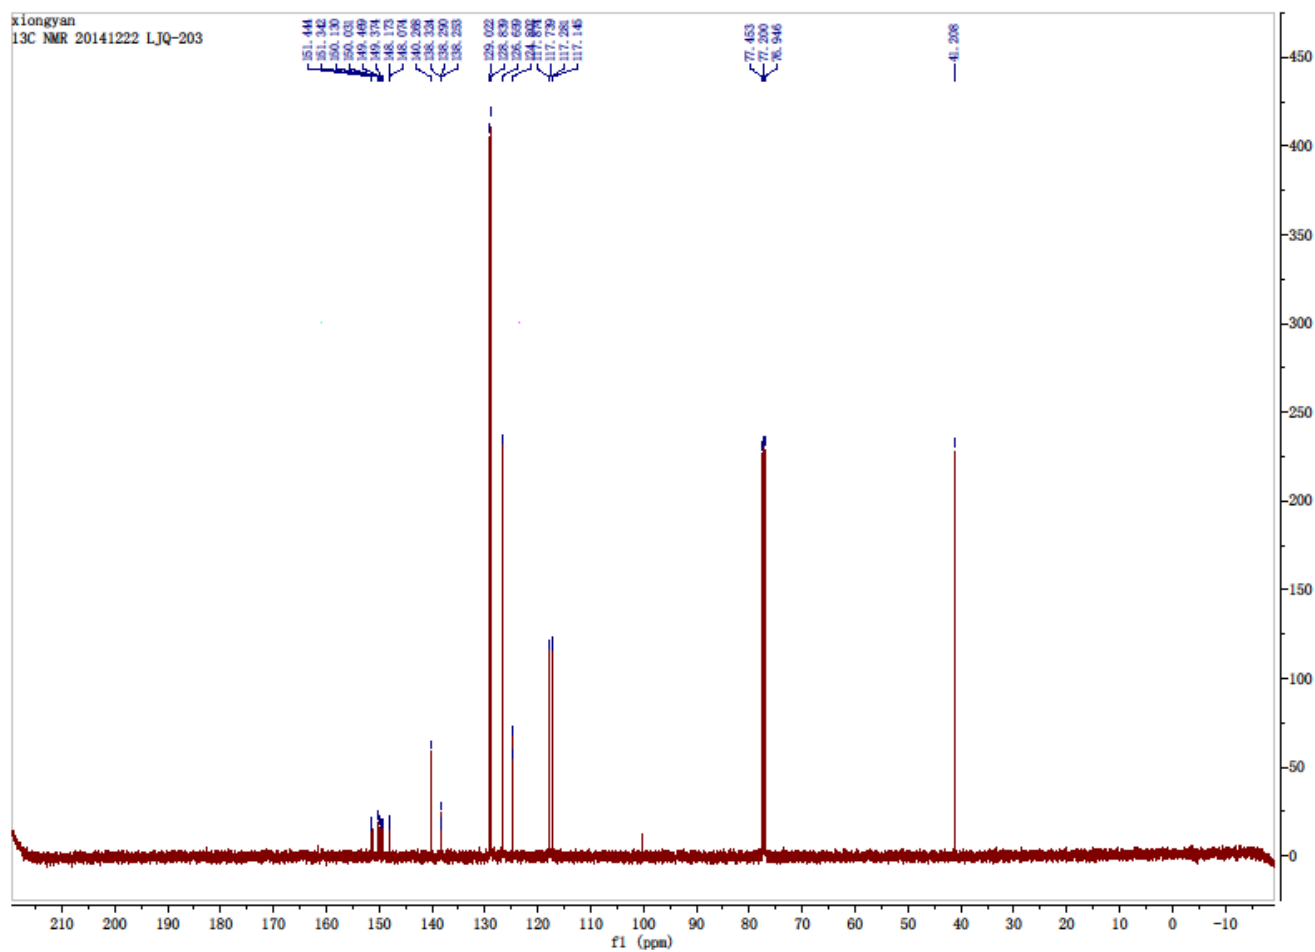

2-Fluorodiphenylmethane (**2e**, 72%)

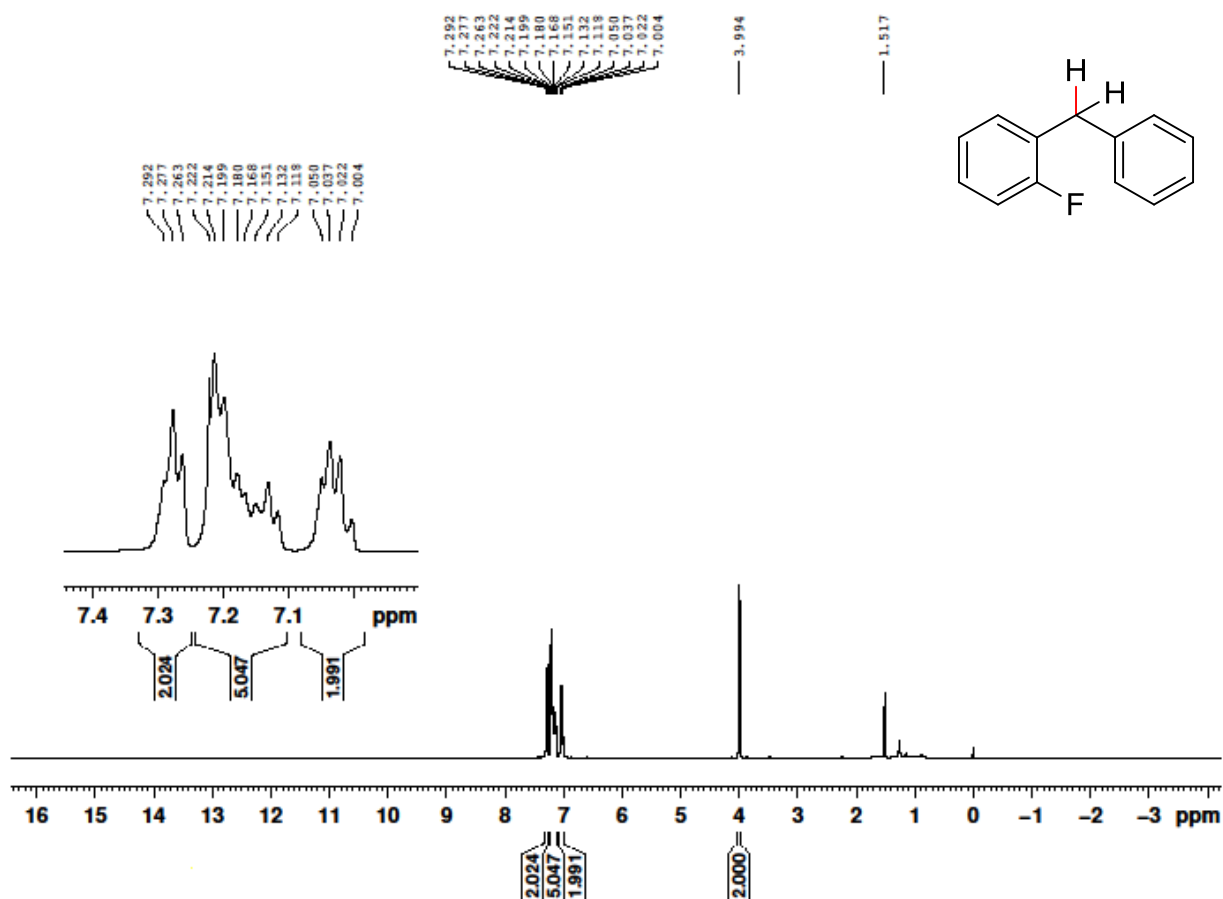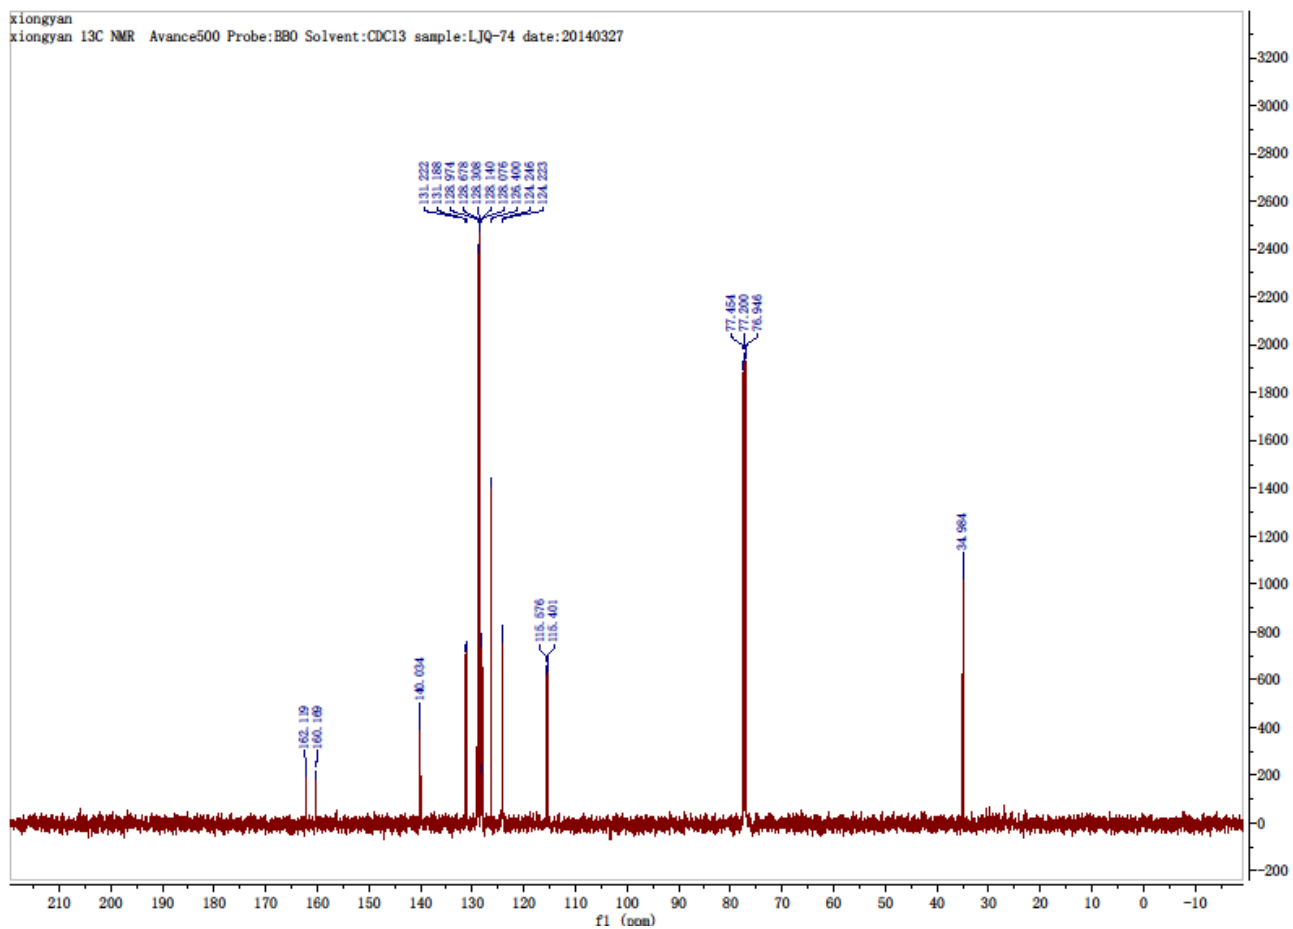

4-Chlorodiphenylmethane (**2f**, 85%)

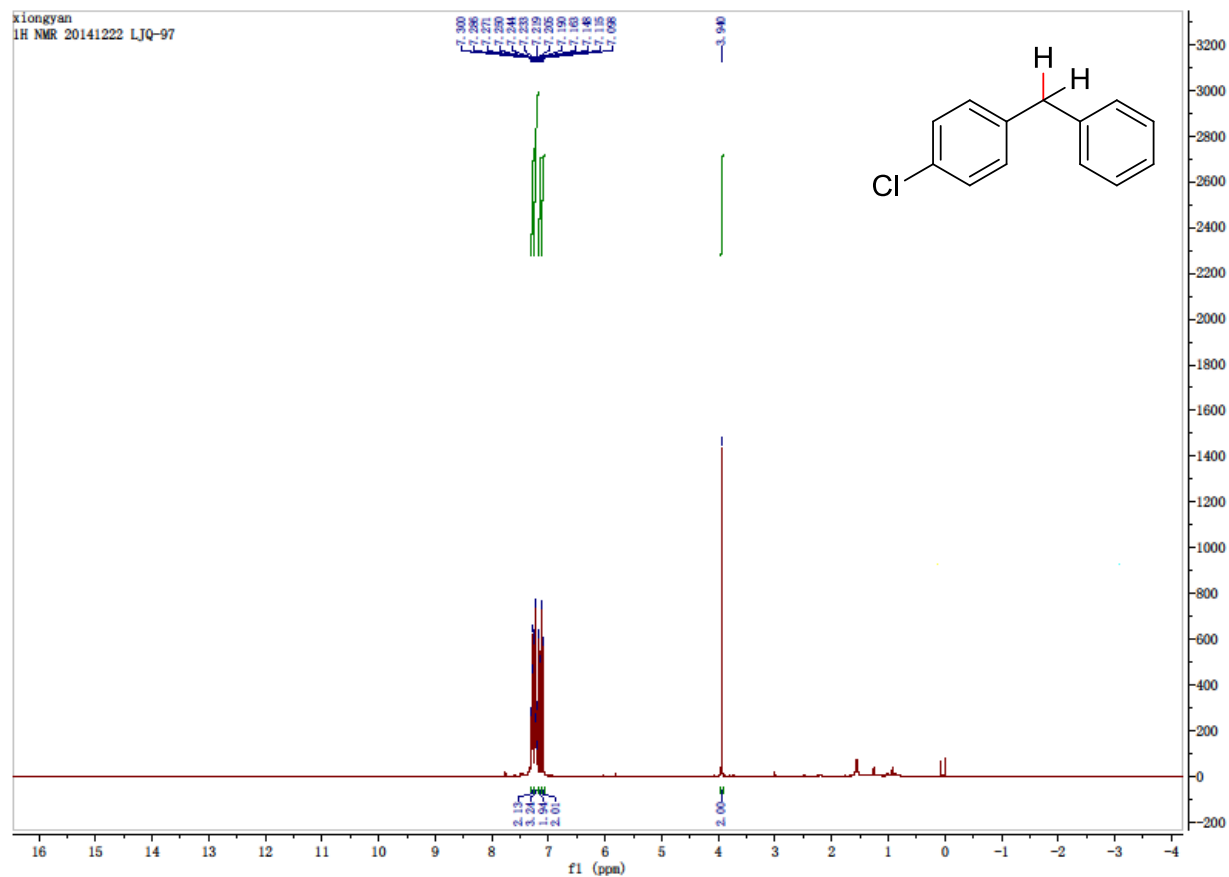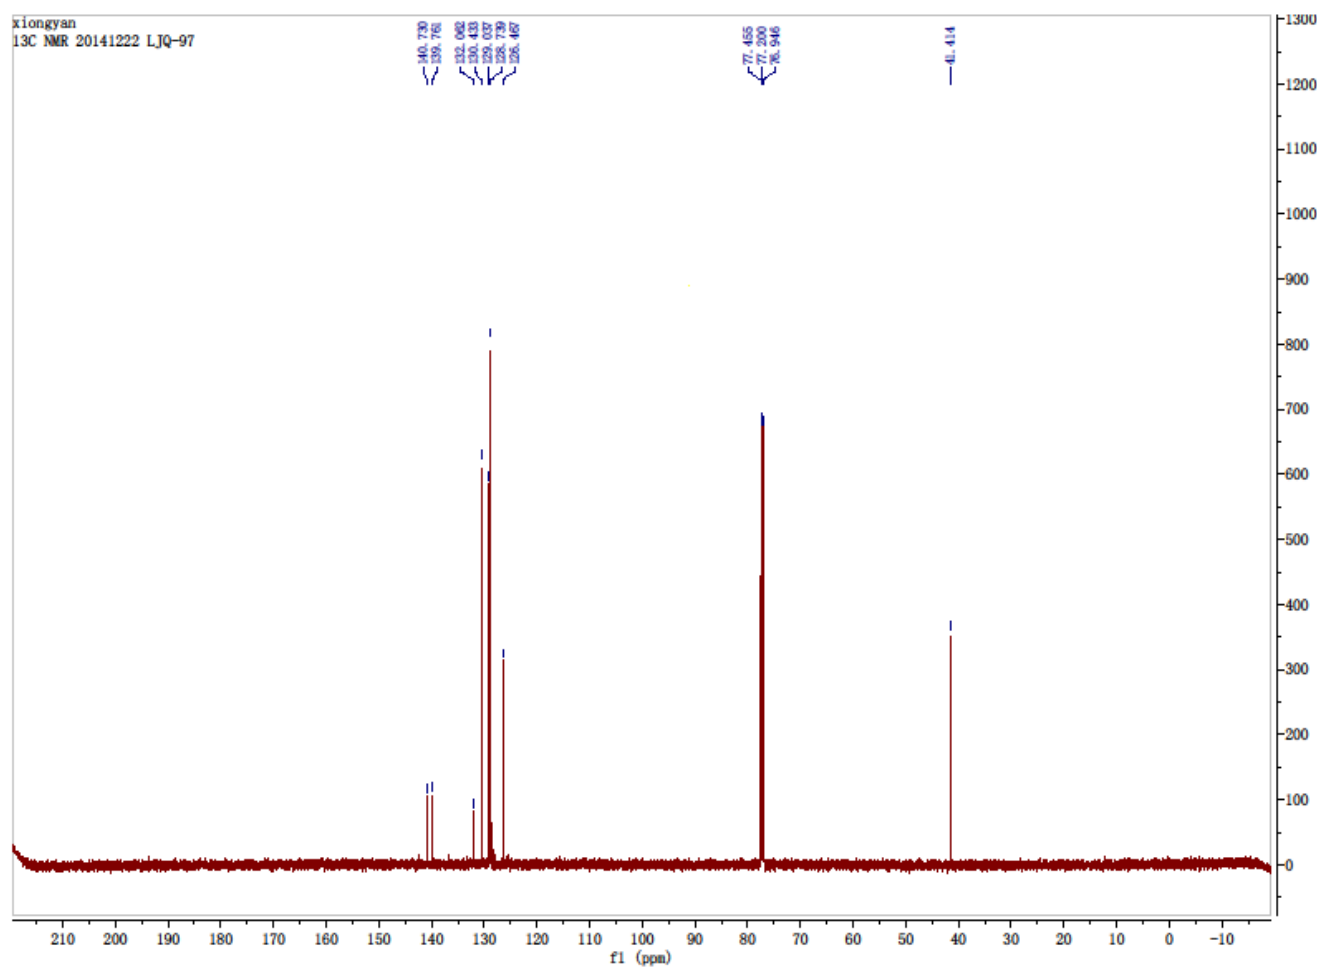



2-Chlorodiphenylmethane (**2g**, 70%)

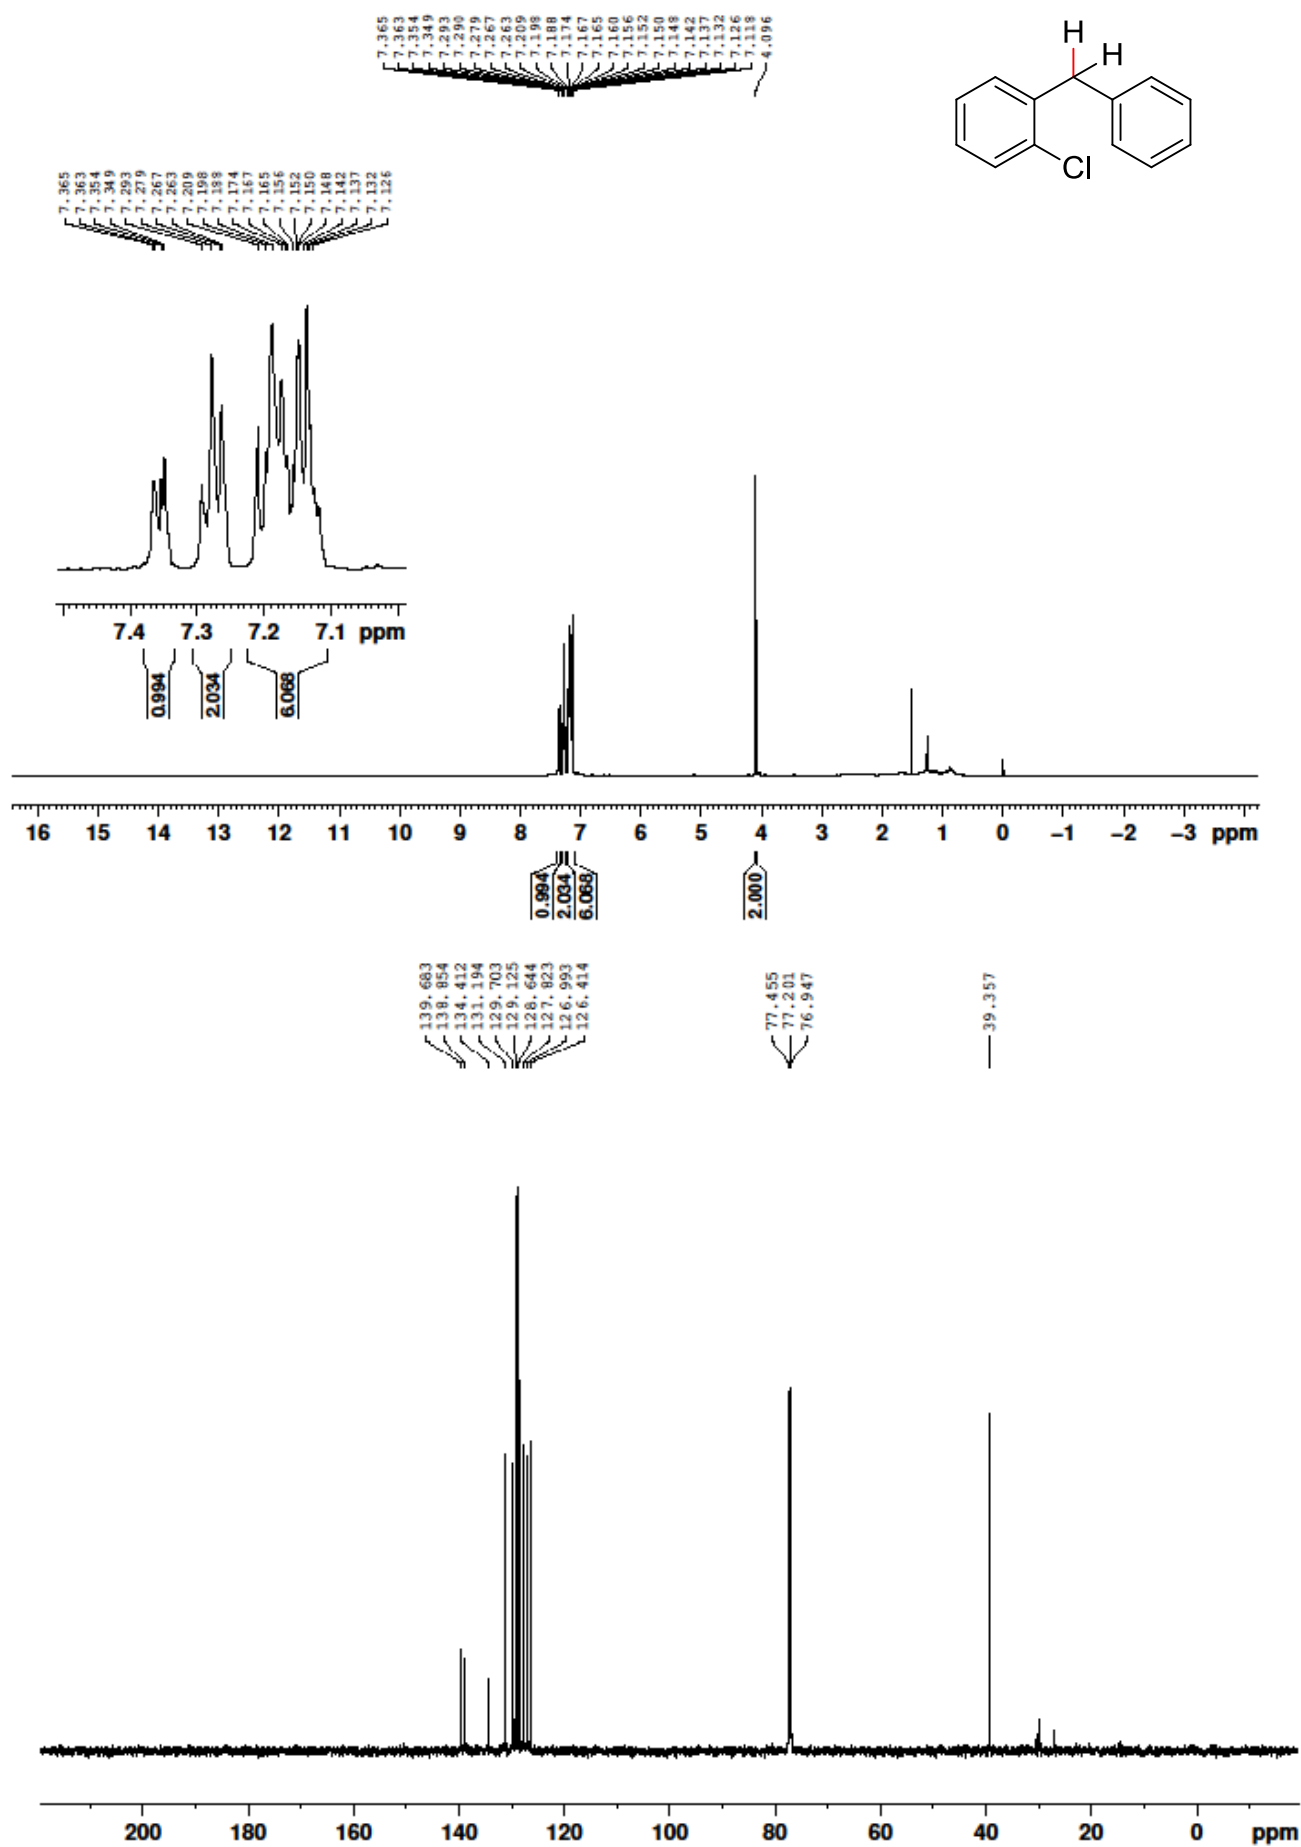

2, 4-Dichlorodiphenylmethane (**2h**, 53%)

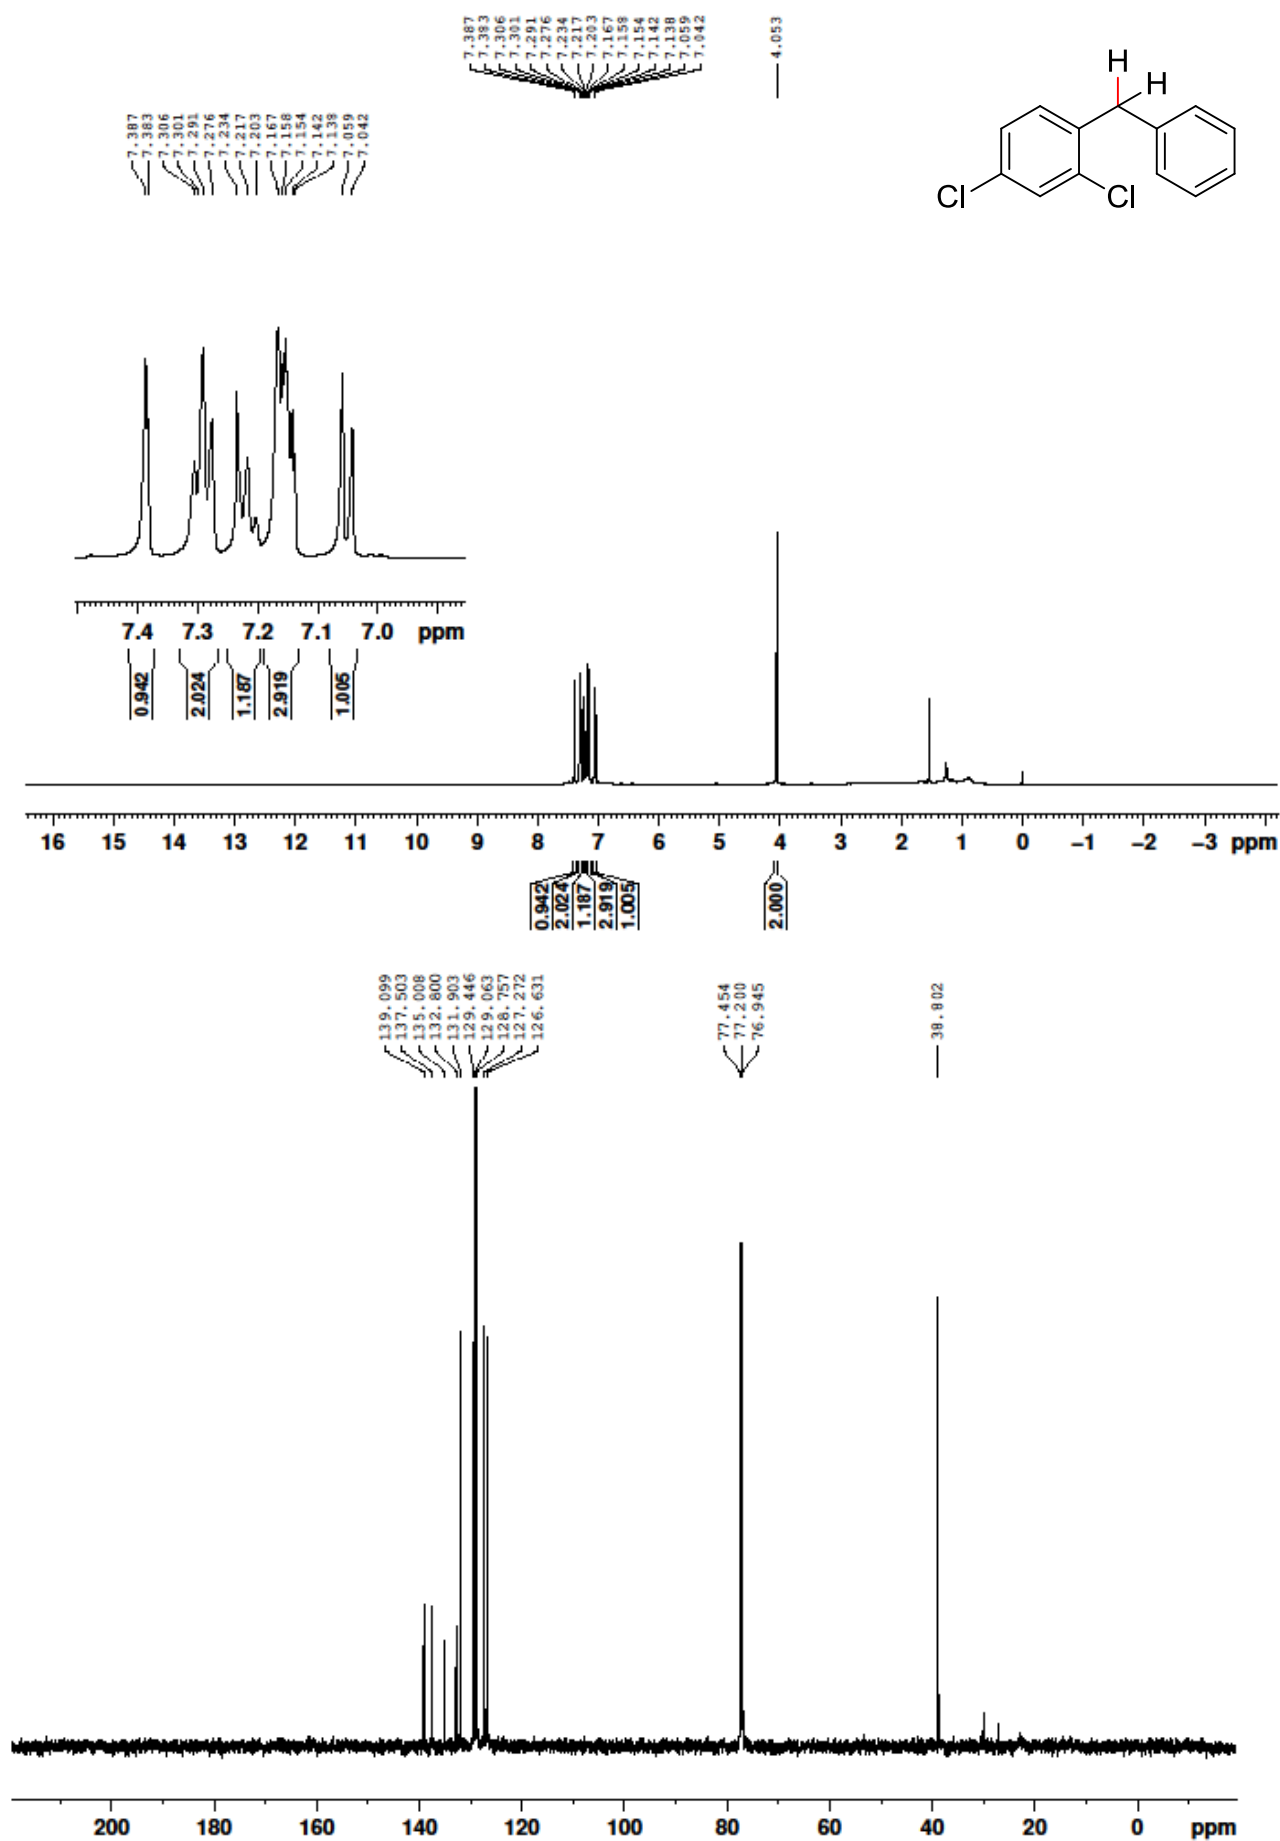

4-Bromodiphenylmethane (**2i**, 94%)

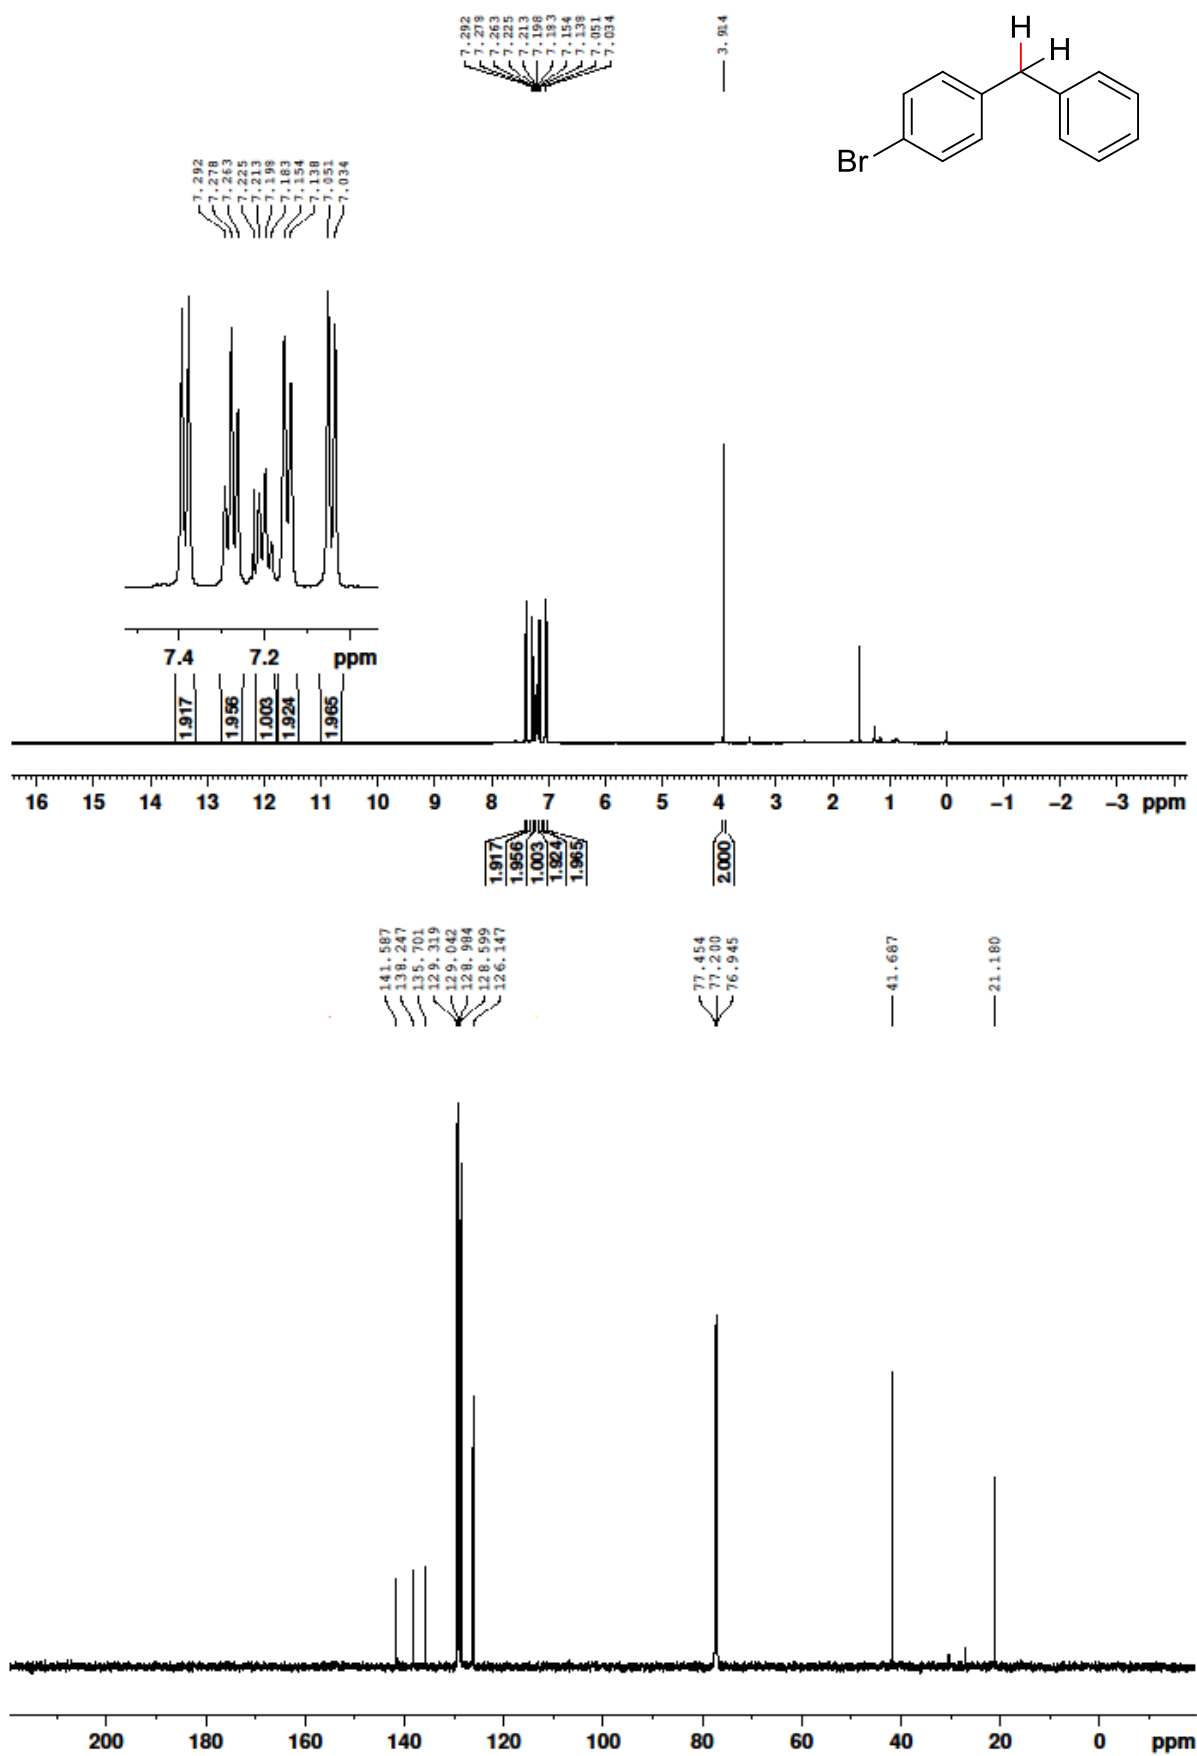

2-Bromodiphenylmethane (**2j**, 70%)

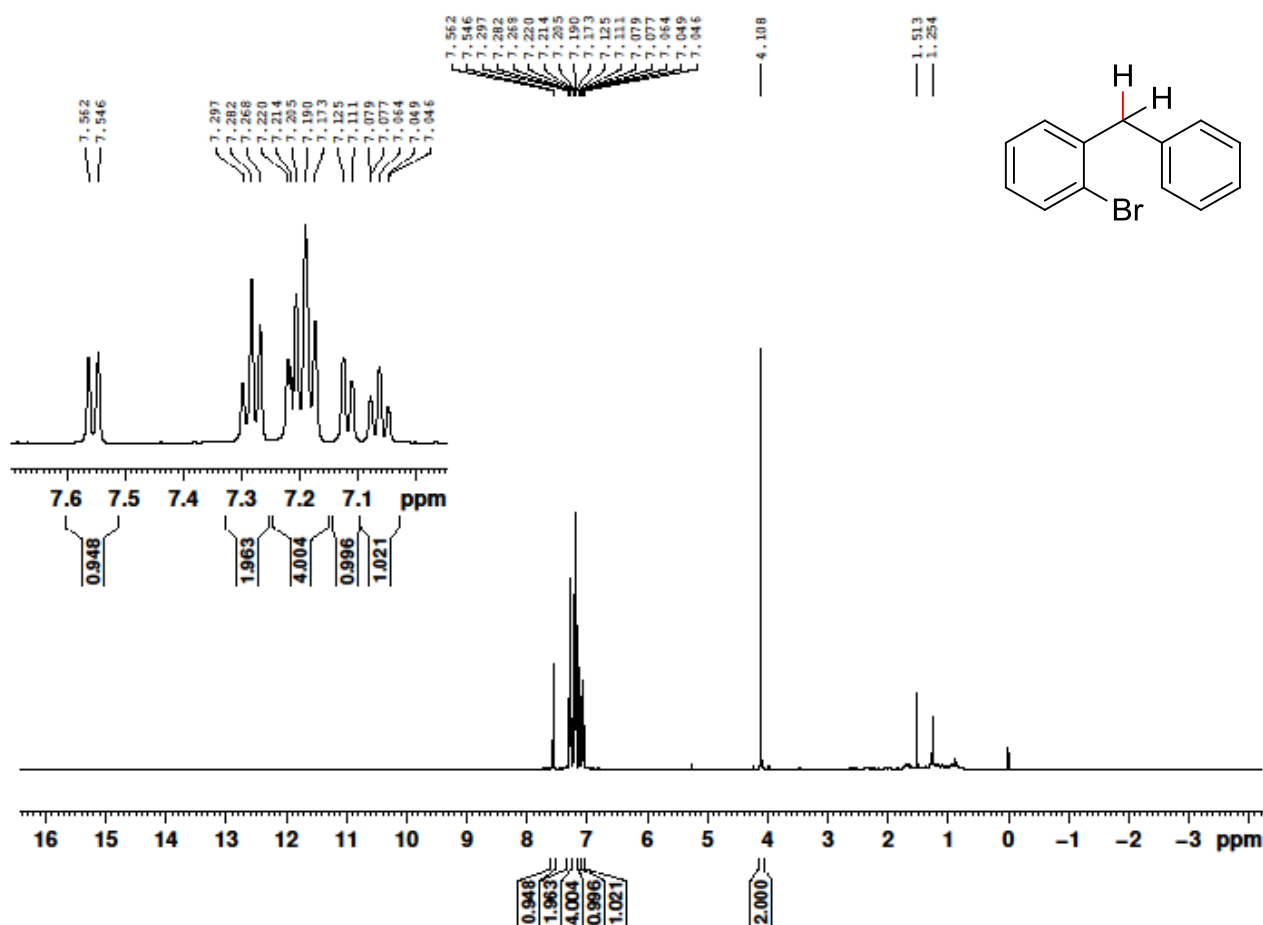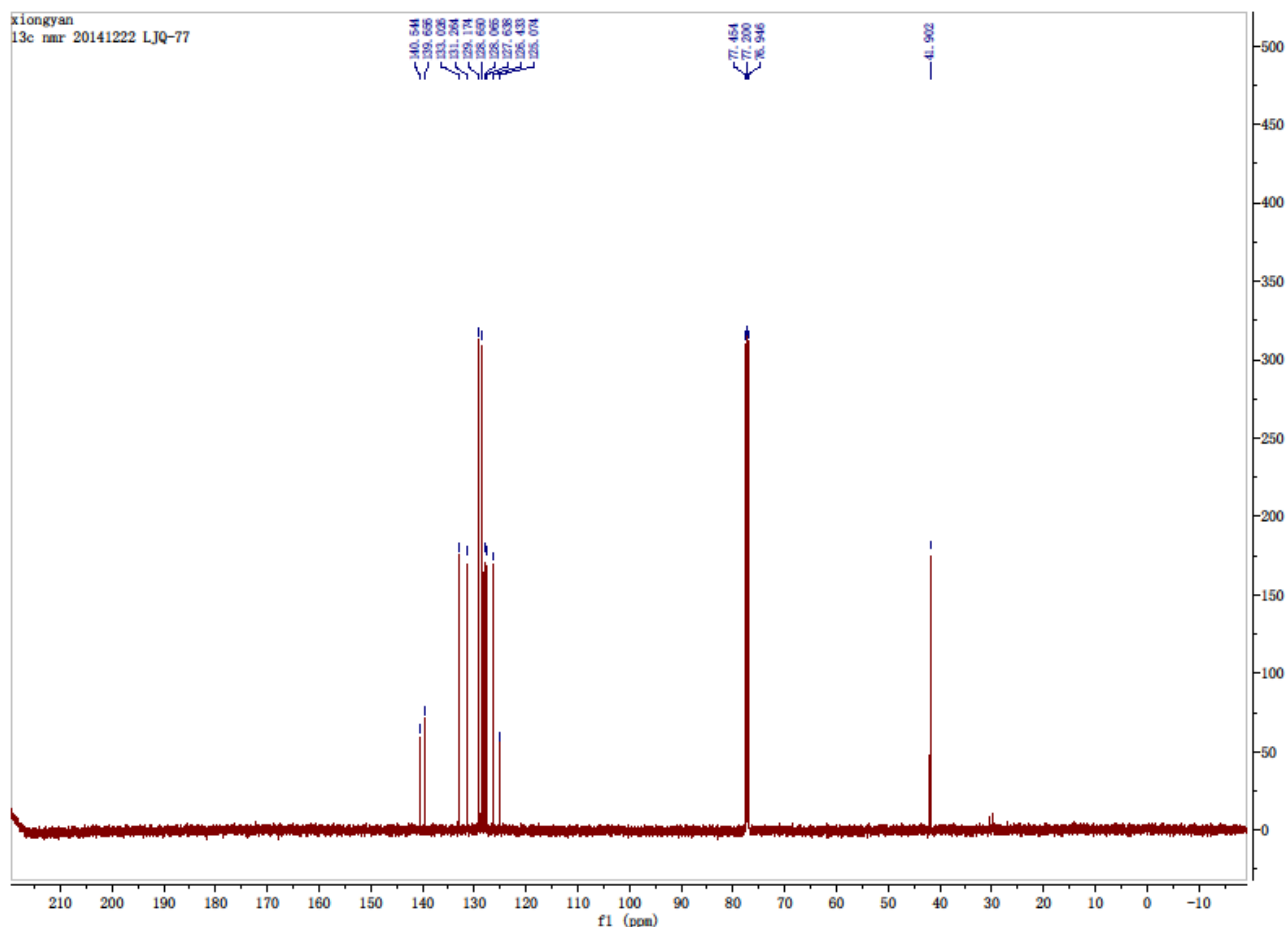

**Chemical Structure:** 1-chloro-2-fluoro-2-phenylethane

**<sup>1</sup>H NMR Spectrum Data:**

| Chemical Shift (ppm) | Multiplicity | Integration |
|----------------------|--------------|-------------|
| ~7.28                | d            | 1.92        |
| ~7.22                | t            | 1.95        |
| ~7.15                | m            | 1.01        |
| ~6.98                | m            | 1.00        |
| ~4.1                 | s            | 1.00        |

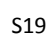

2-Fluoro-4-bromodiphenylmethane (**2l**, 59%)

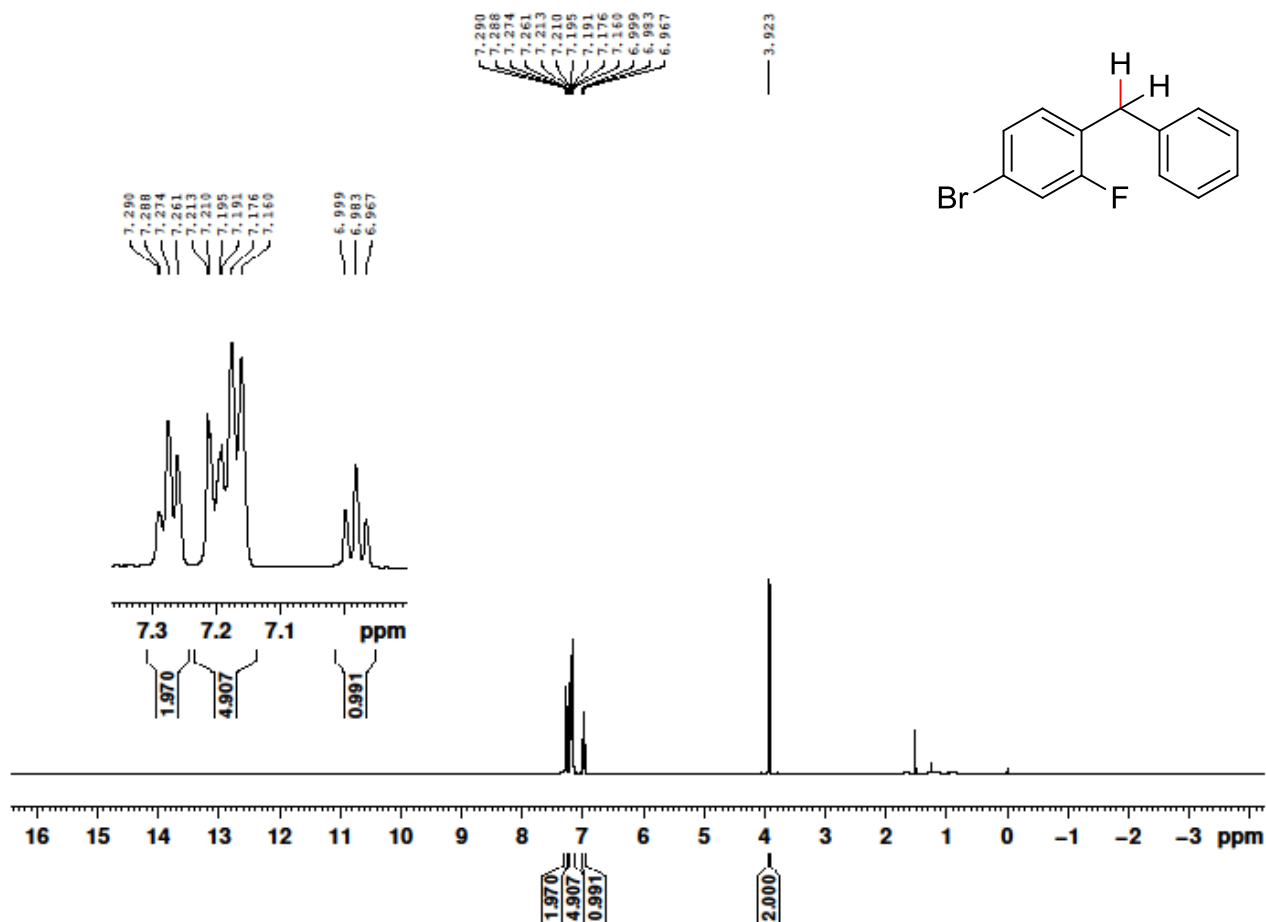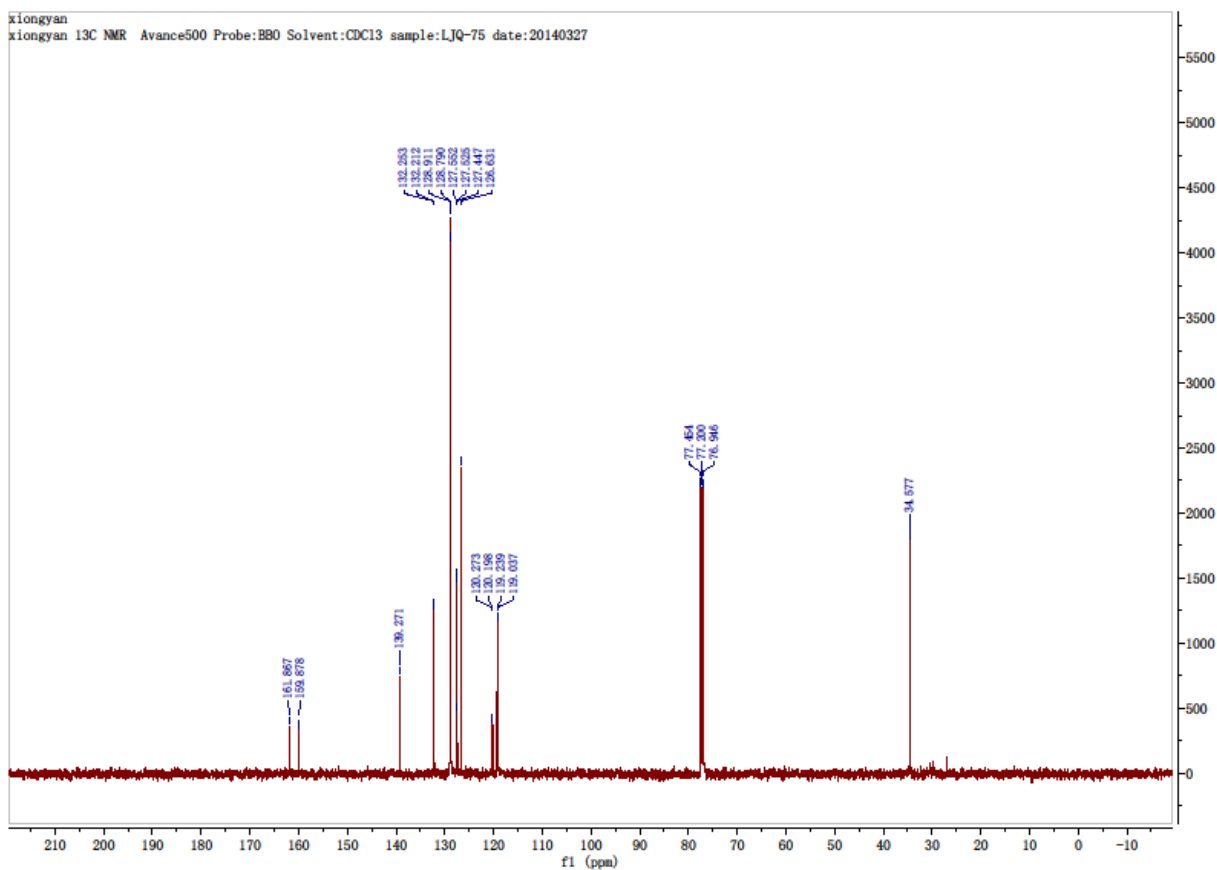

4-Methyl-diphenylmethane (**2m**, 93%)

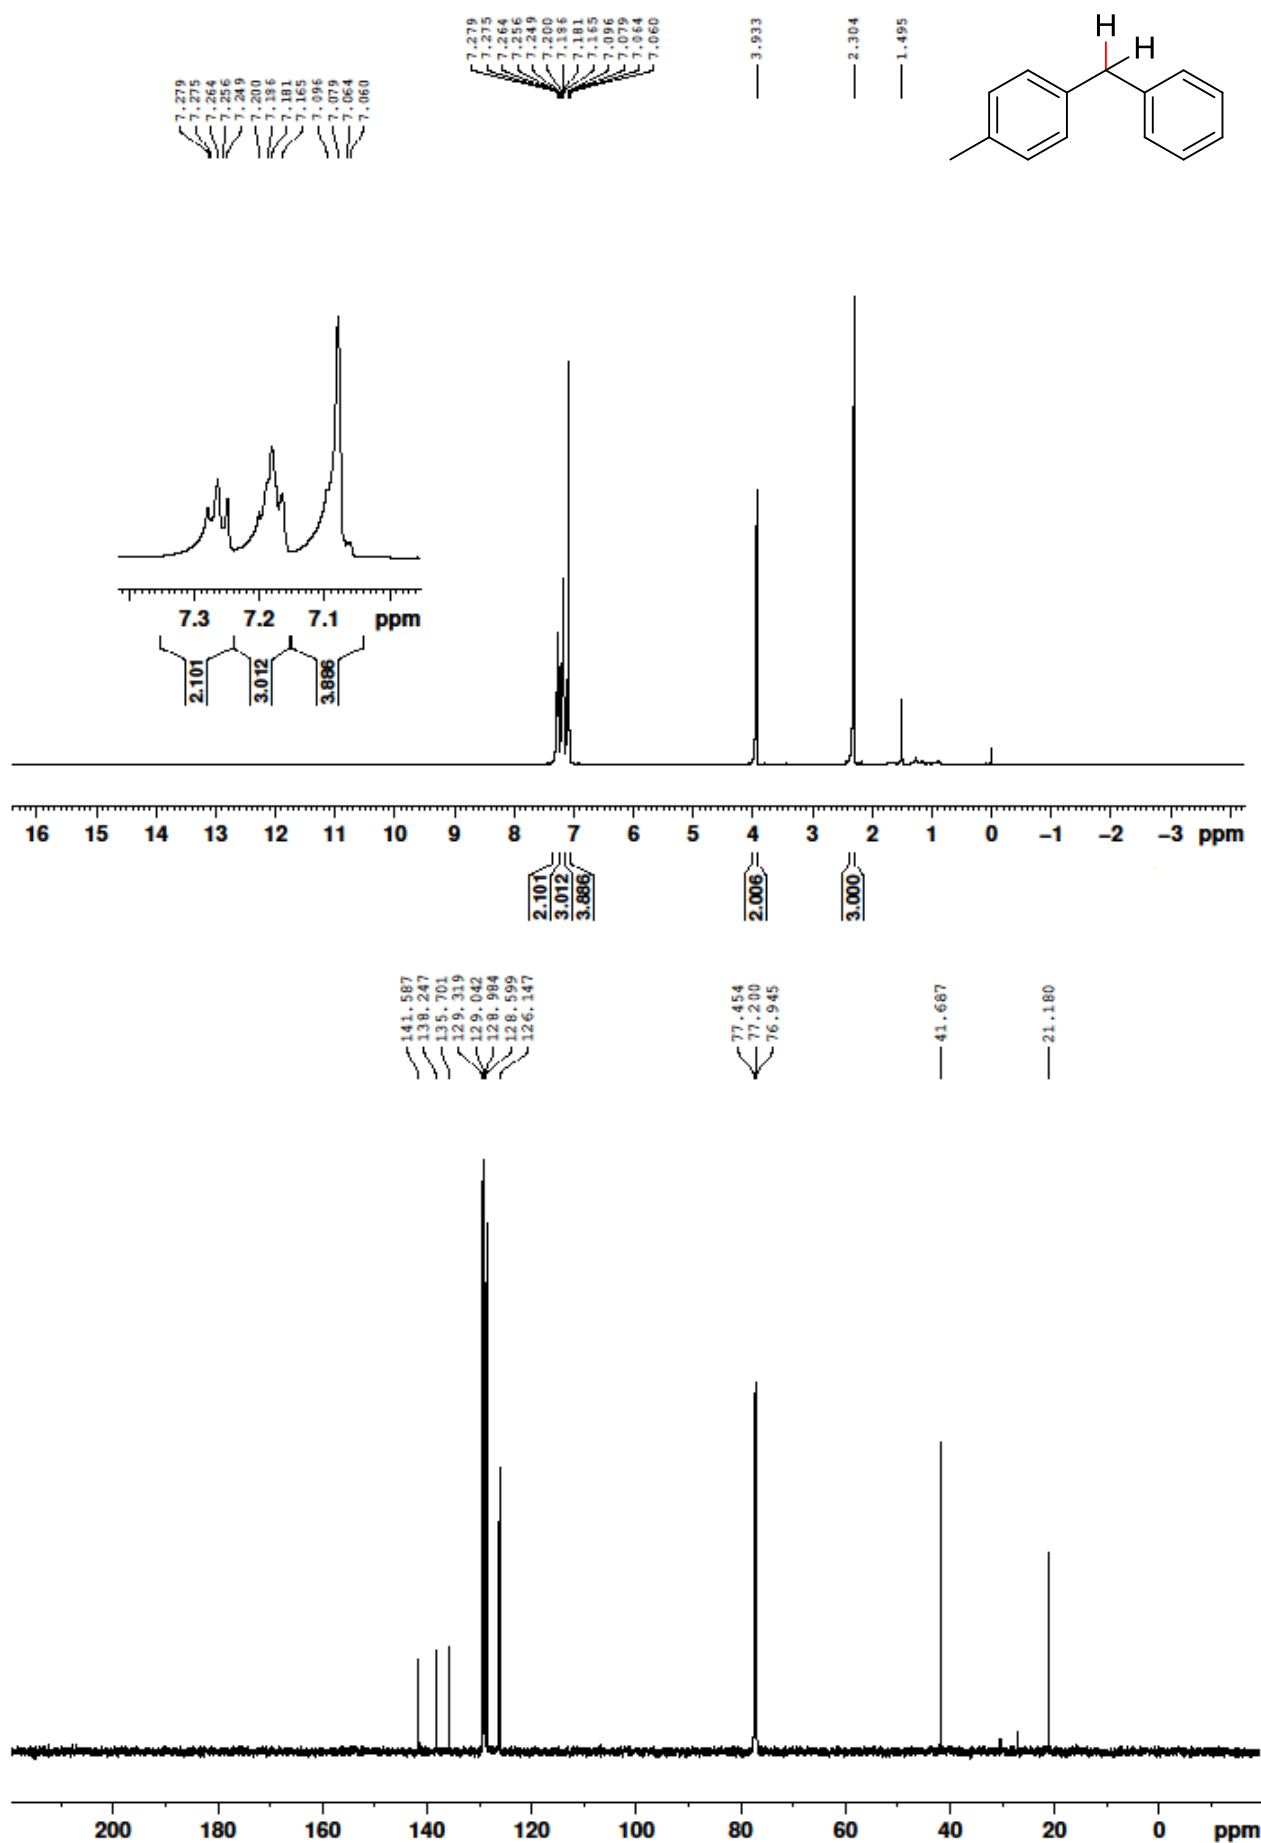

4, 4'-Dimethoxydiphenylmethane (**2n**, 24%)

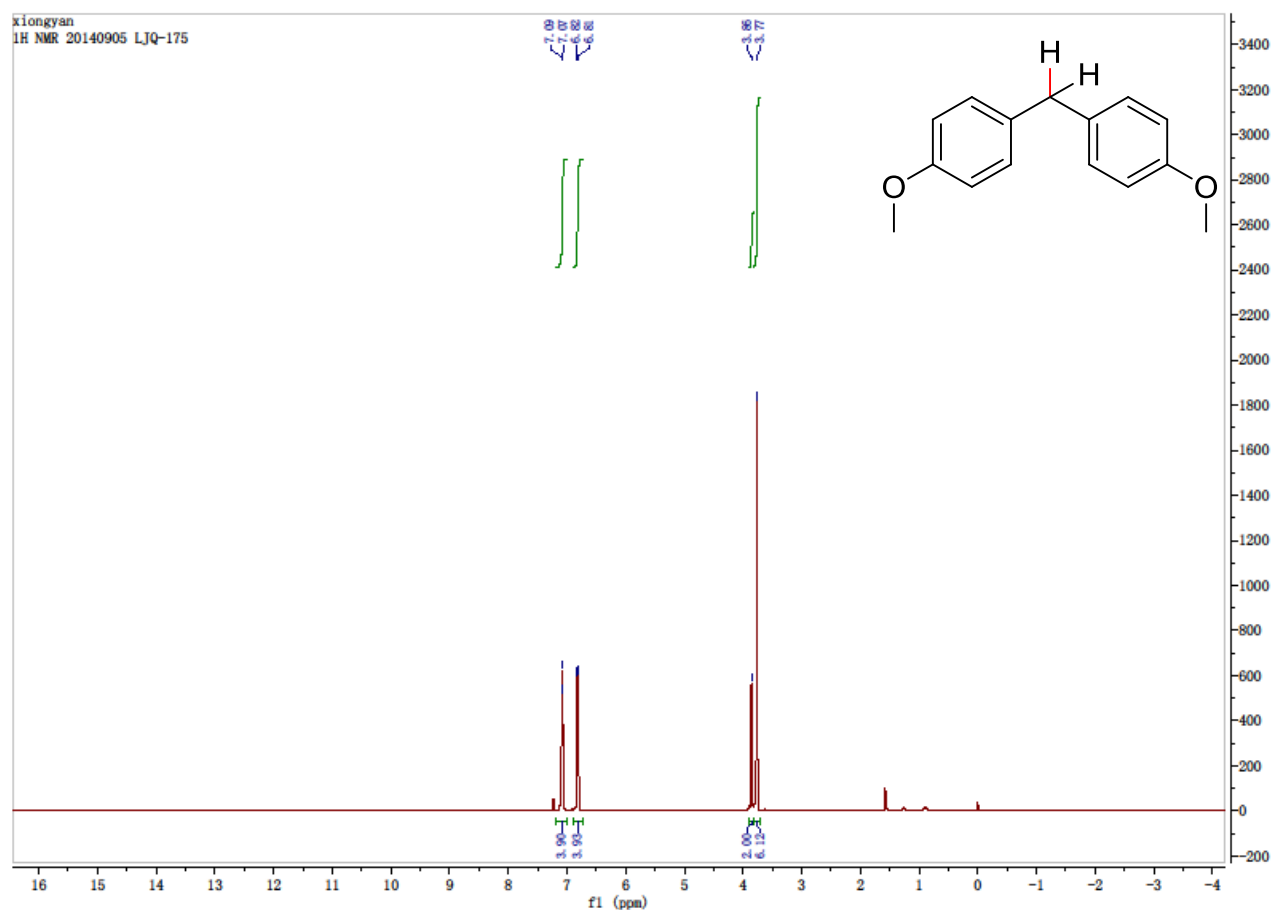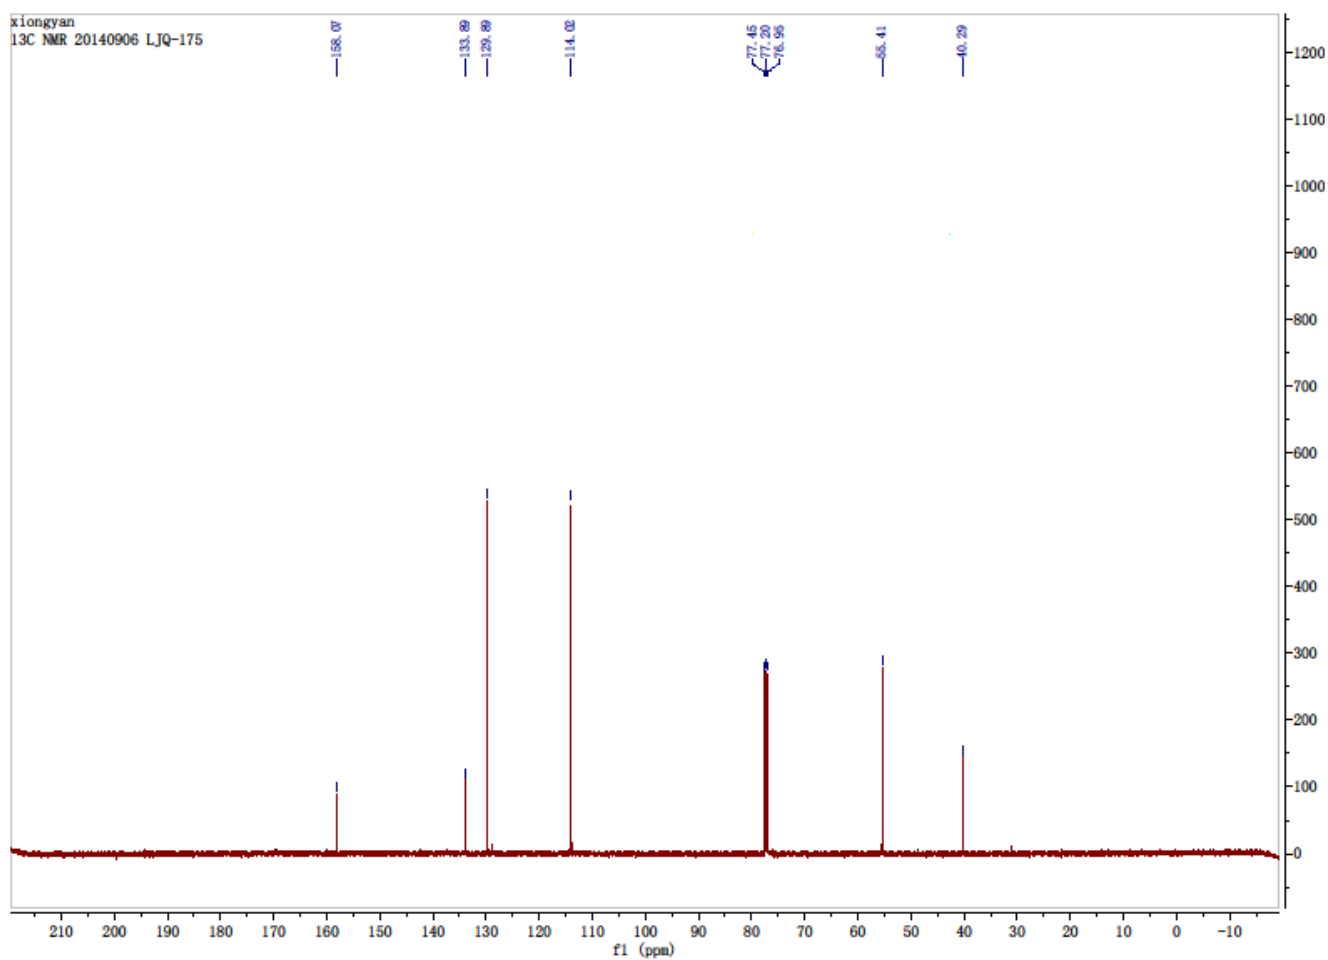



# 4-Trifluoromethyldiphenylmethane (**2o**)

xiongyan  
1H NMR 20150826 LJQ-255

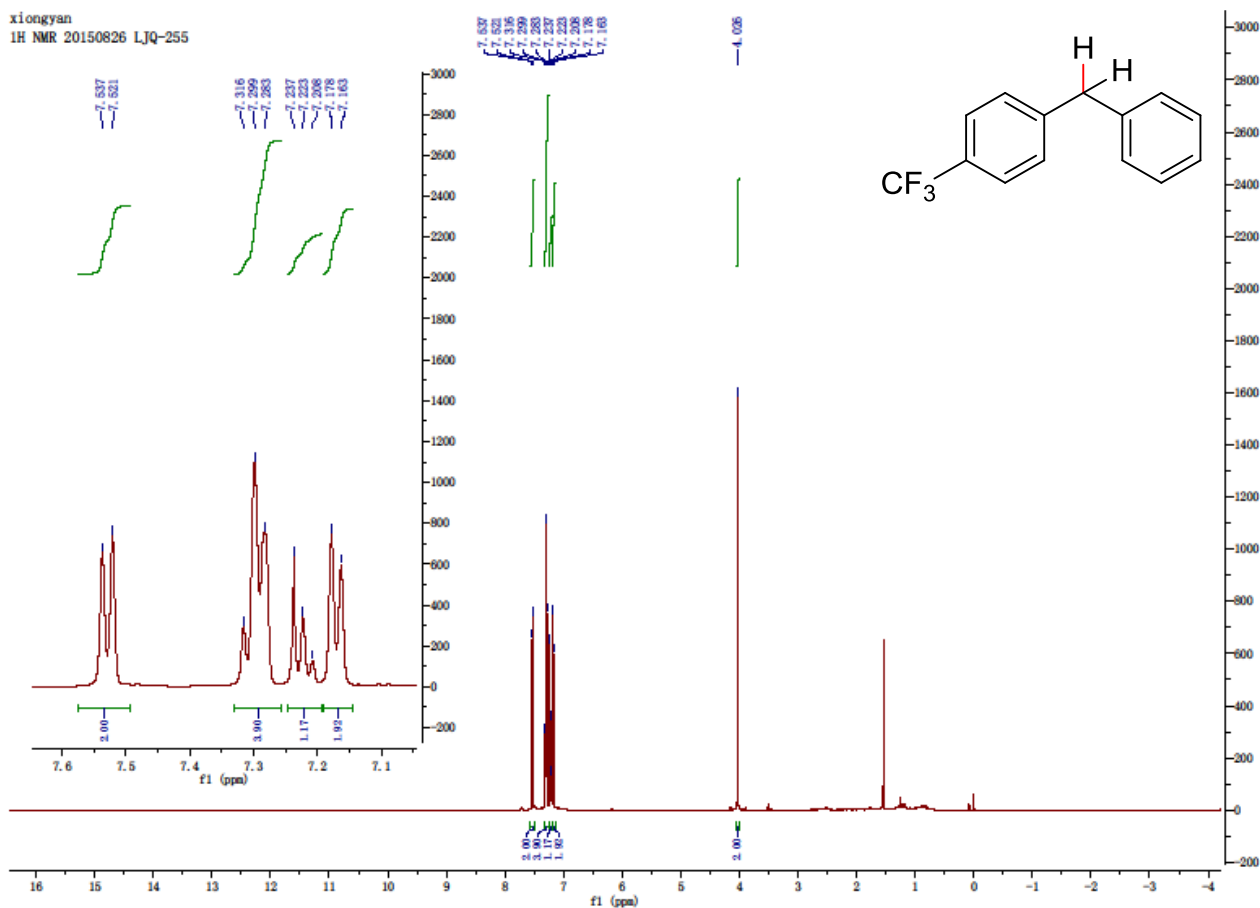

xiongyan  
13C NMR 20150826 LJQ-255

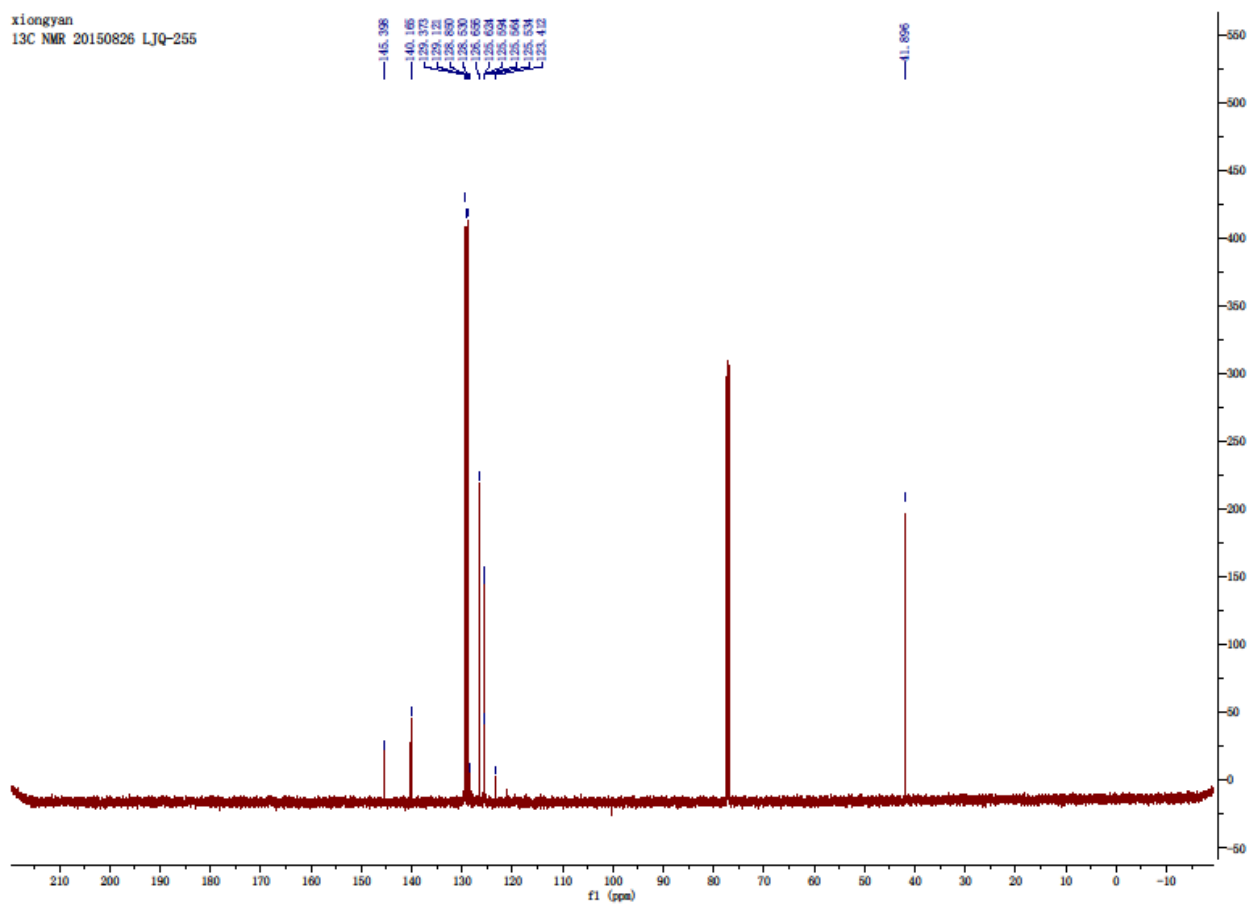

# Diphenylmethane-4-carboxylic acid methyl ester (2p)

xiongyan  
1H NMR 0827 LJQ-263

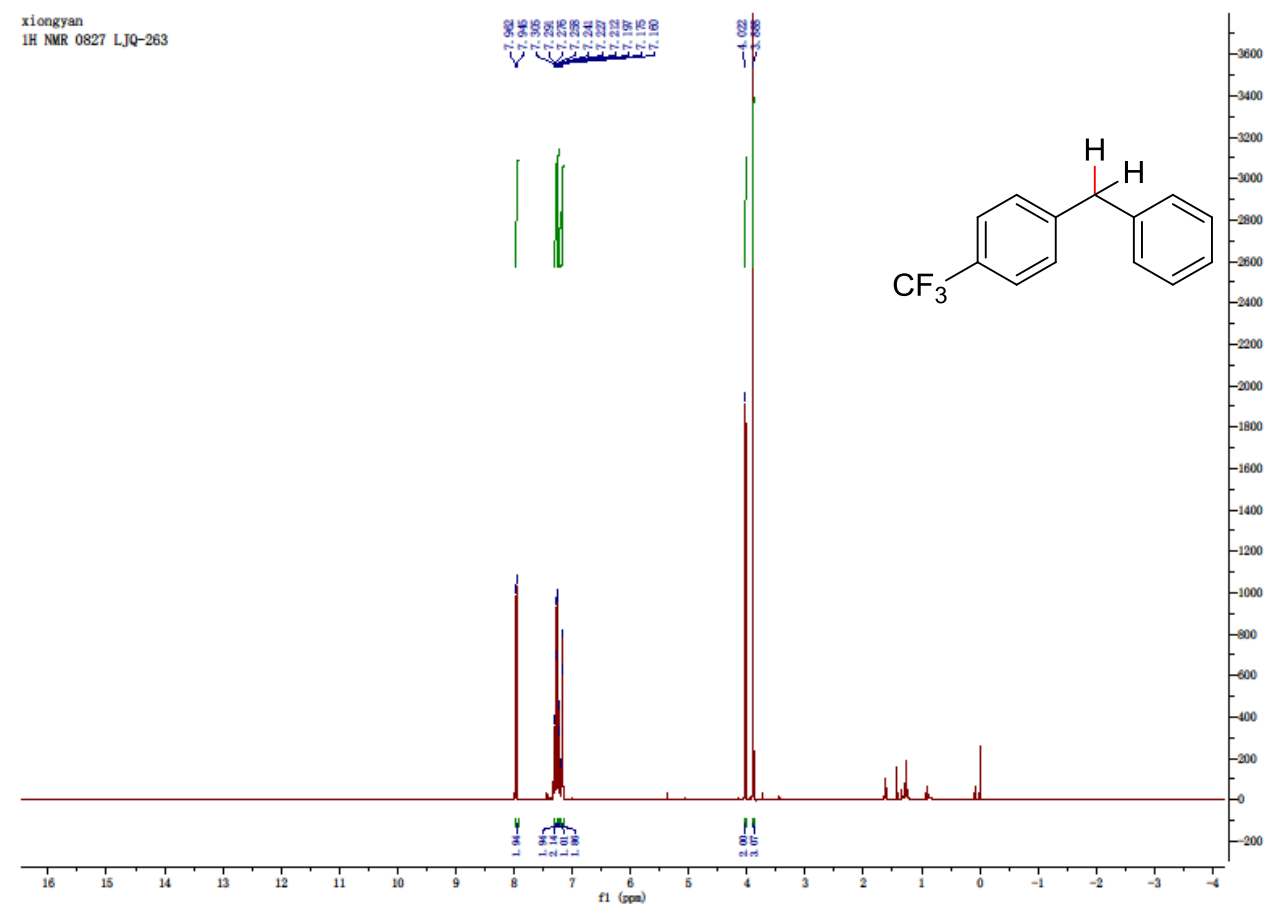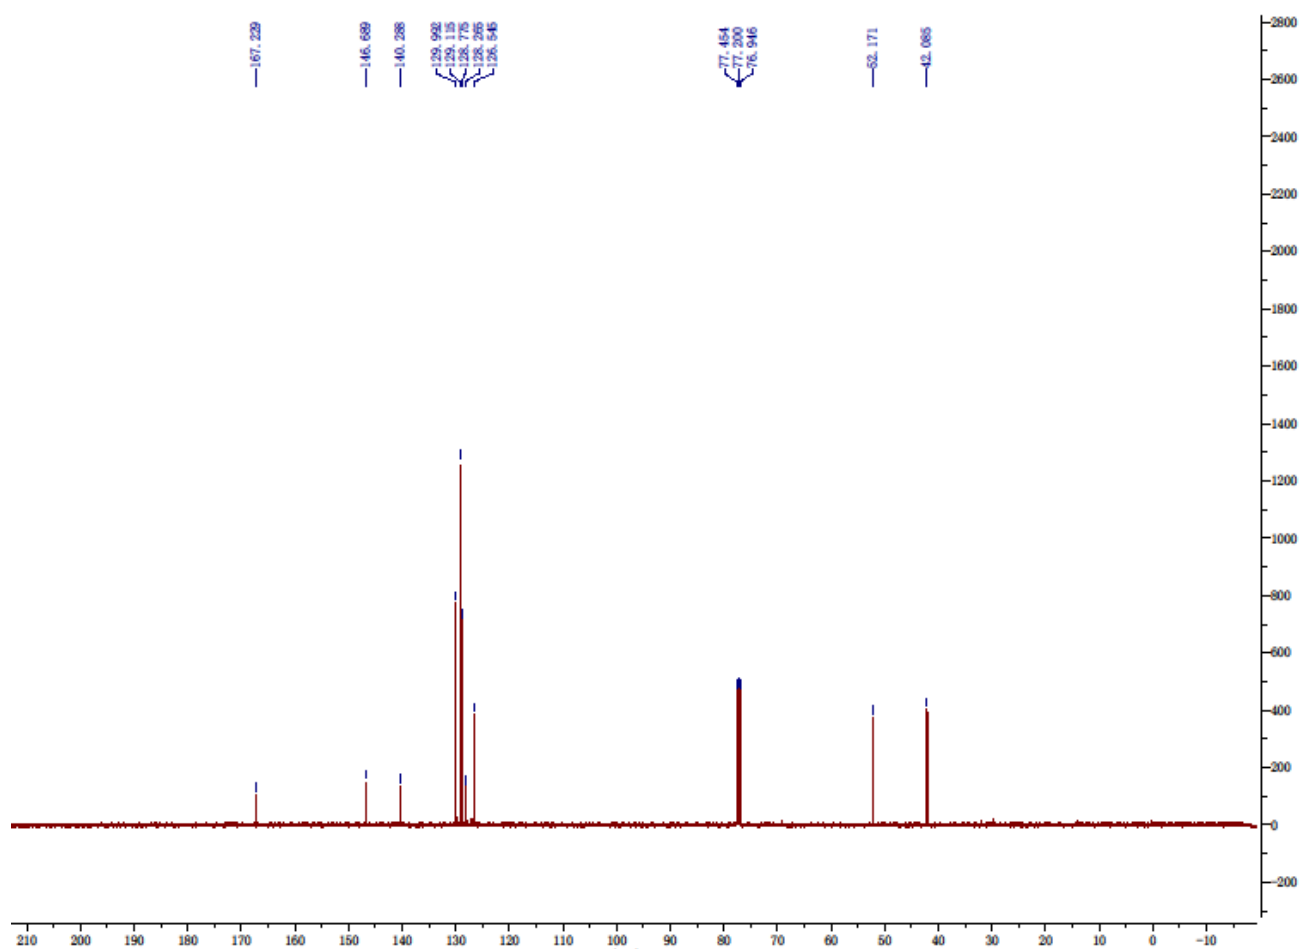

2-(4-Methylbenzyl)naphthalene (**2q**, 76%)

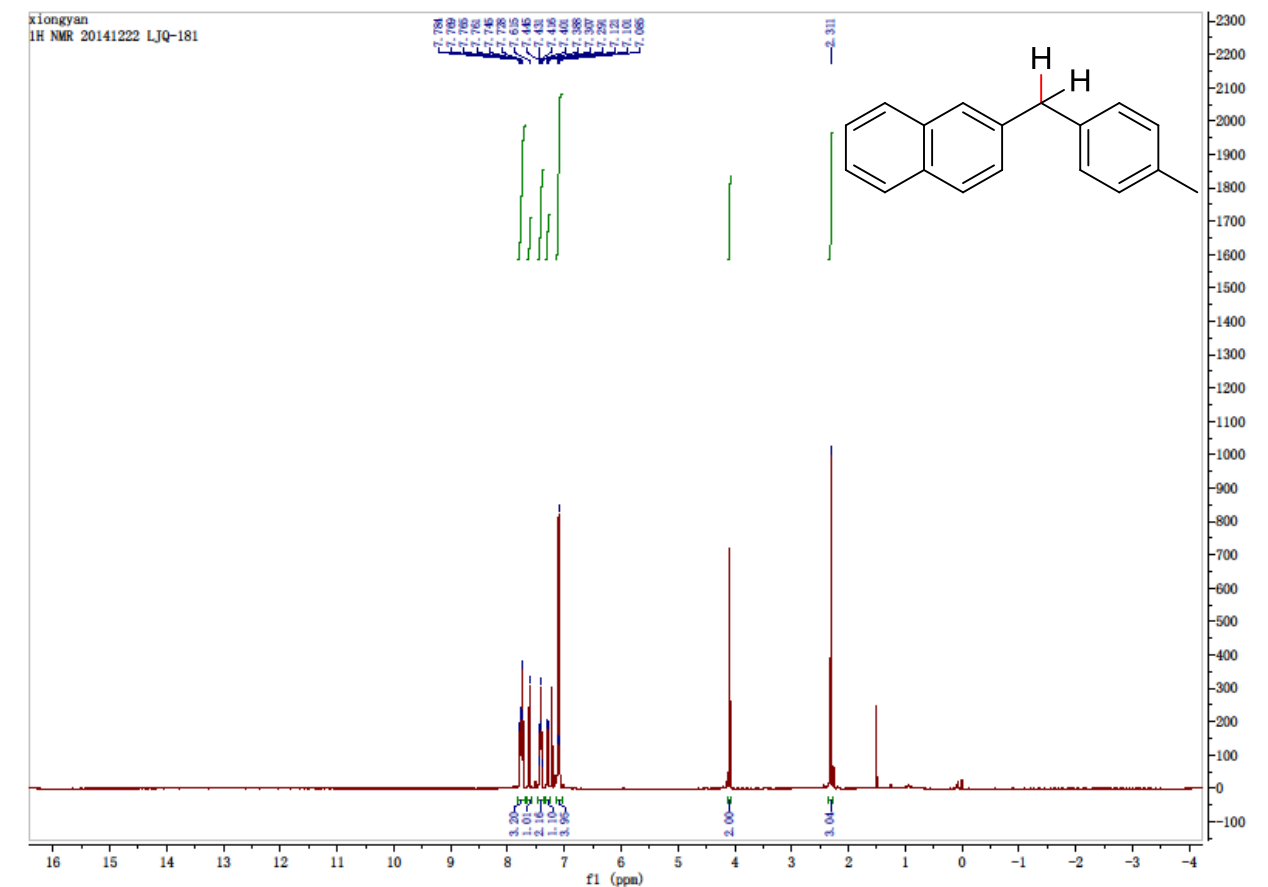

Triphenylmethane (**2r/2s**, 95%/91%)

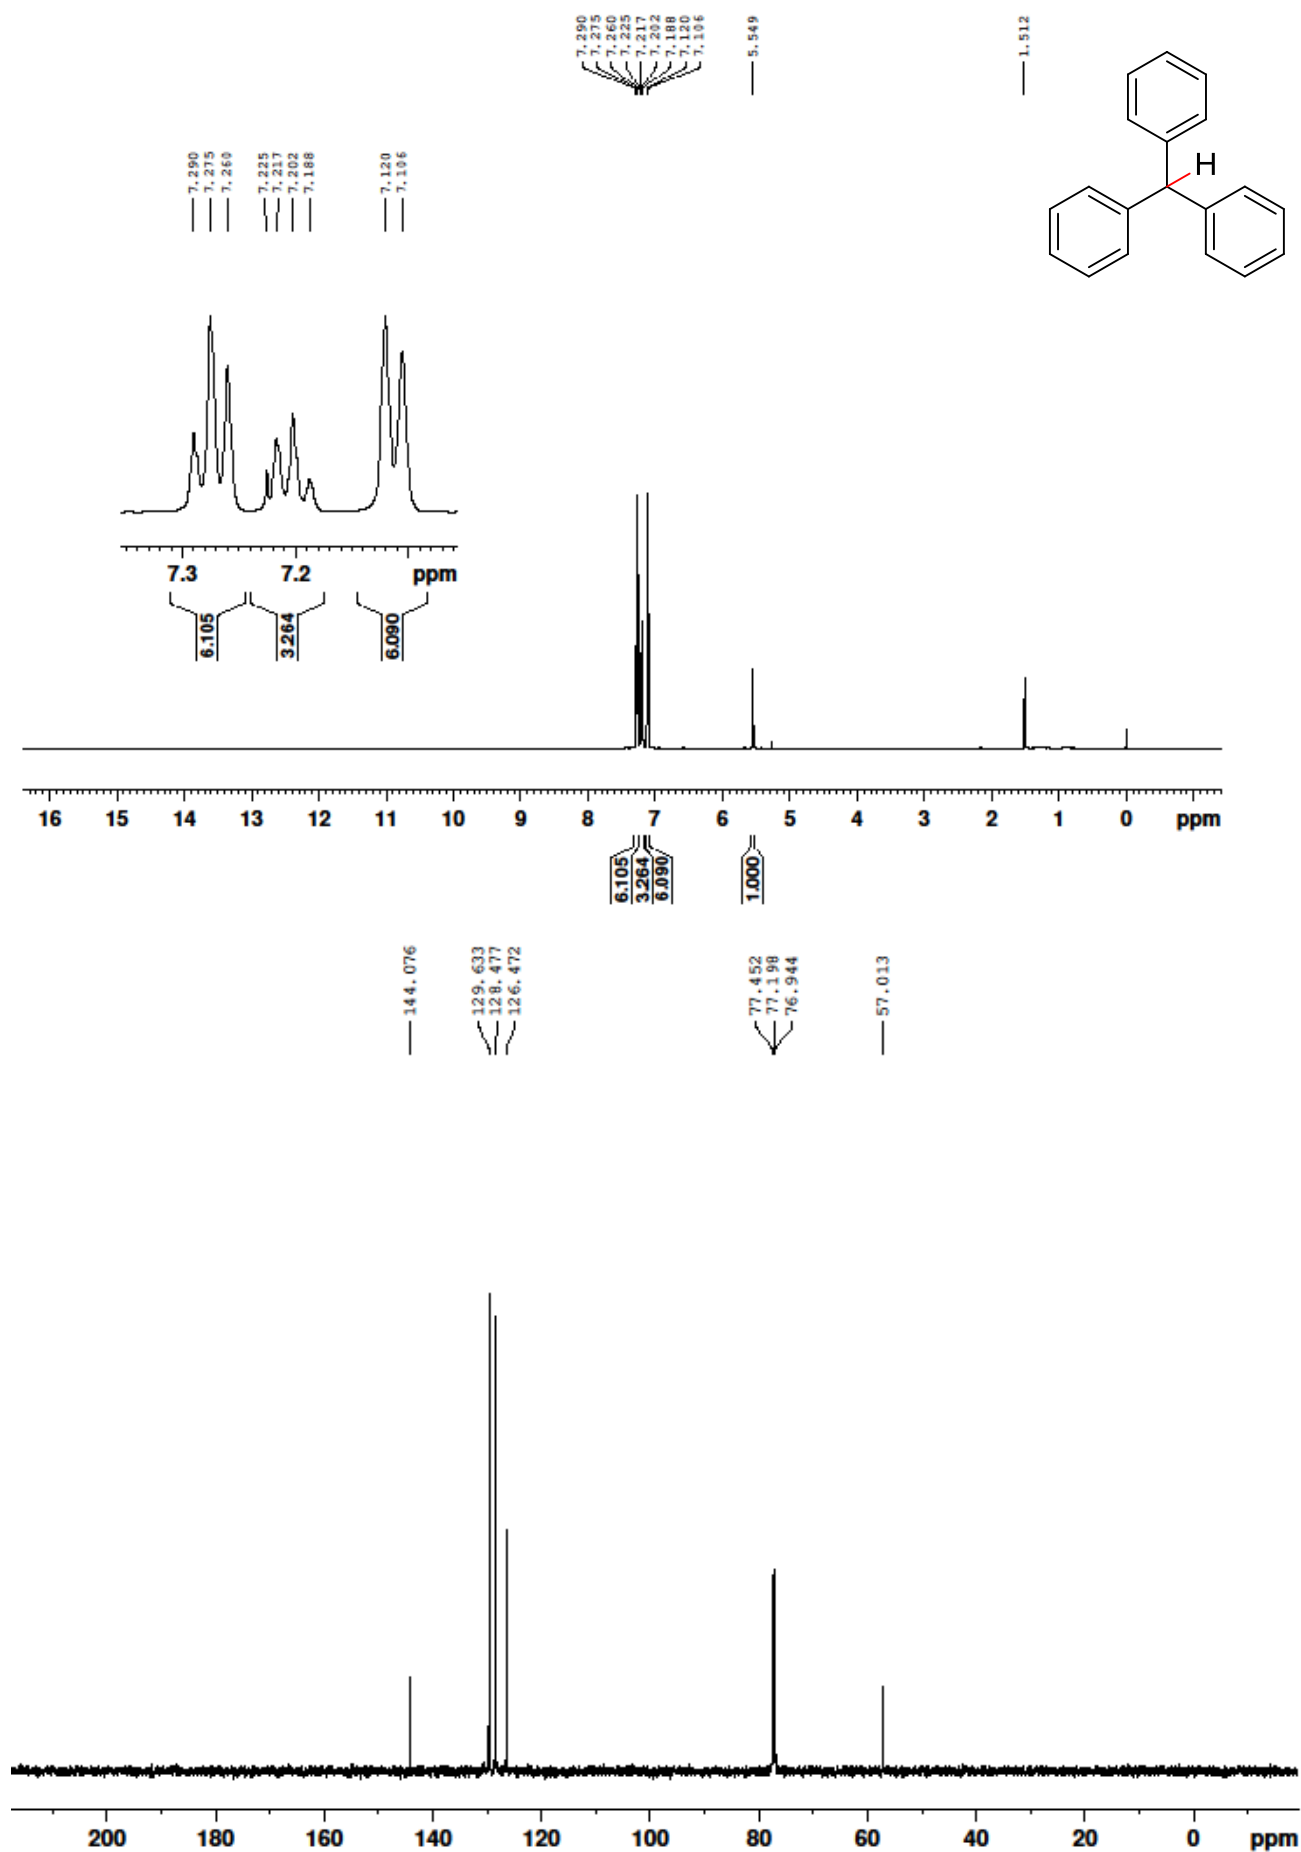

Adamantane (**2t**, 29%)

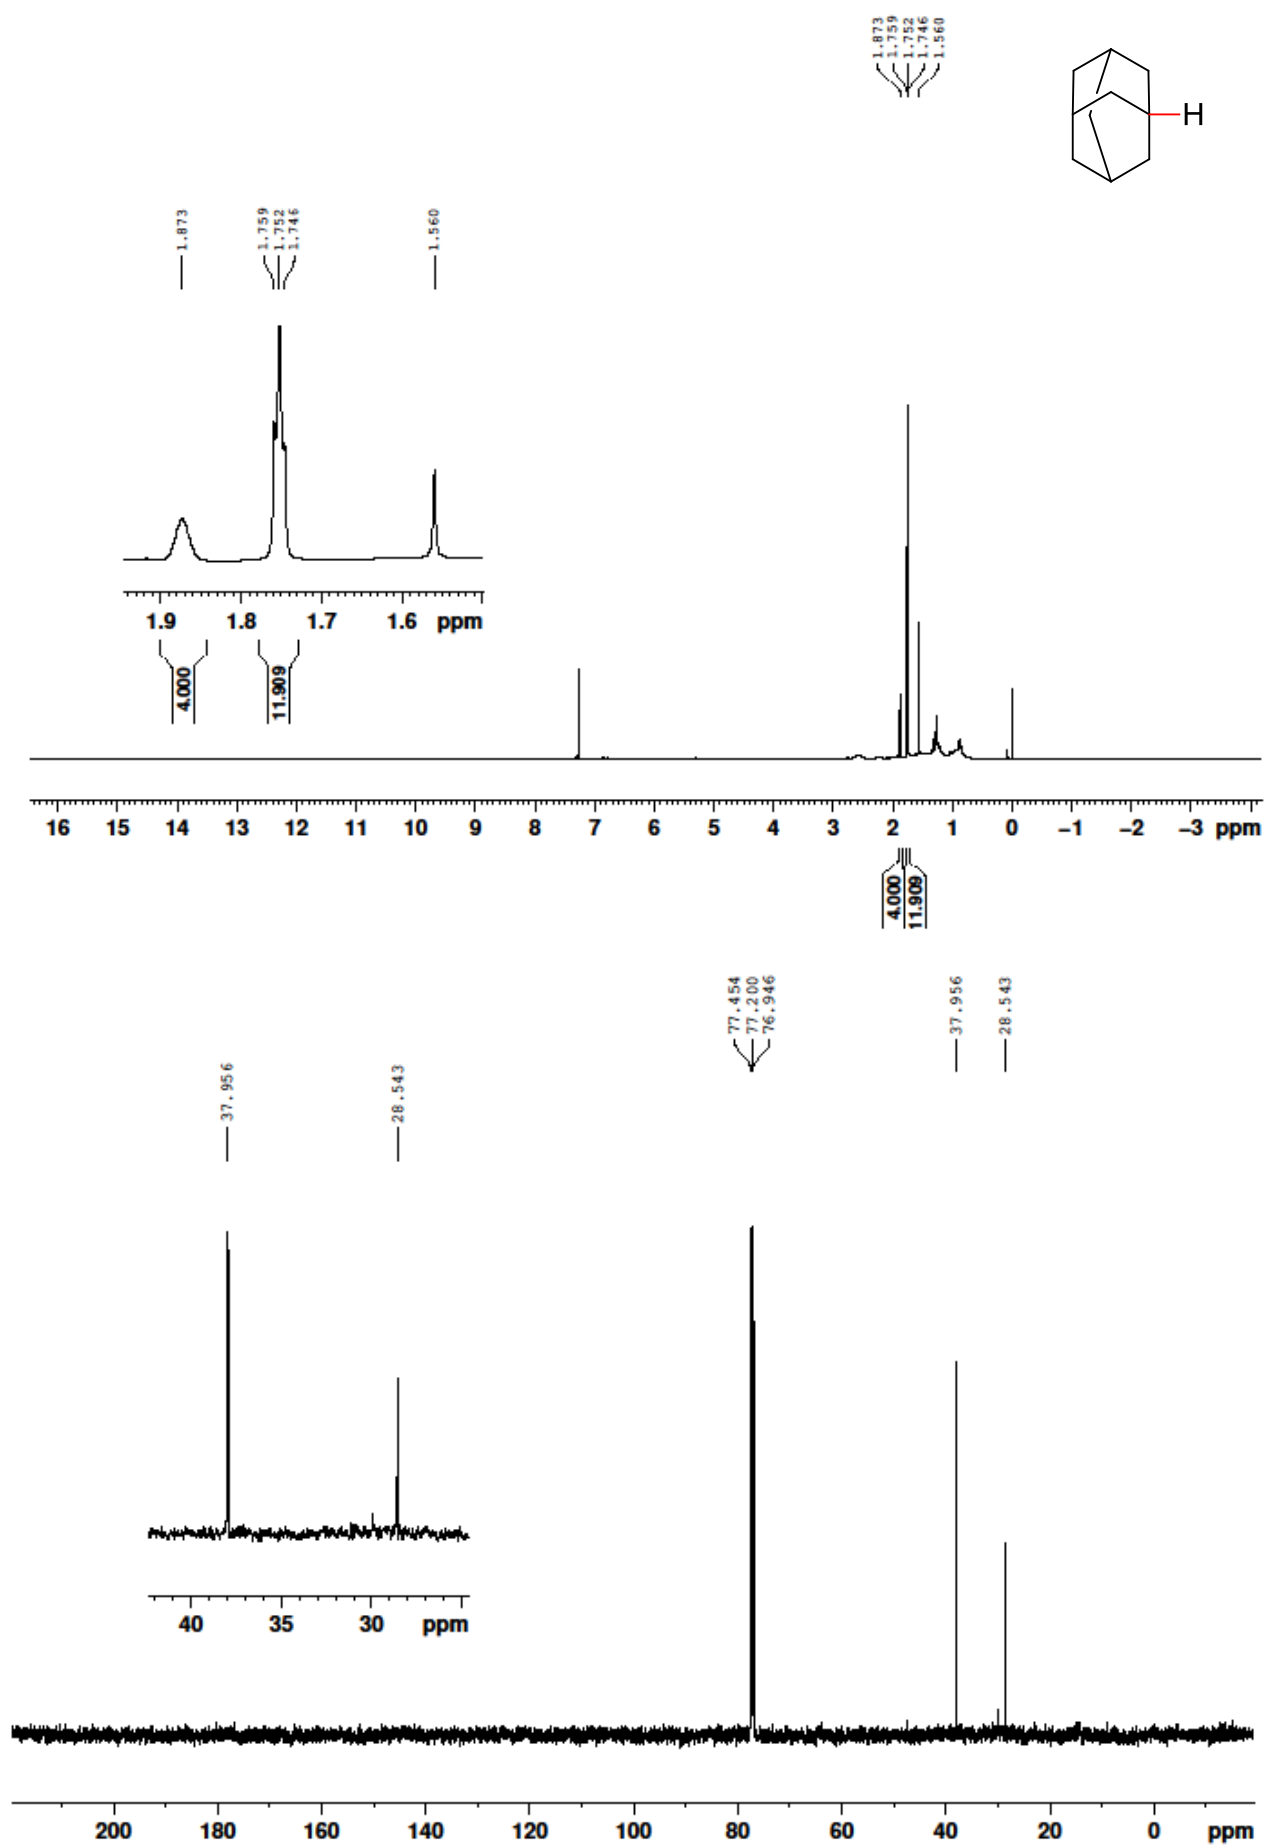

Prop-1-ene-1,1-diylidibenzene (**2w**, 99%)

xiongyan  
1H NMR 0827 LJQ-262

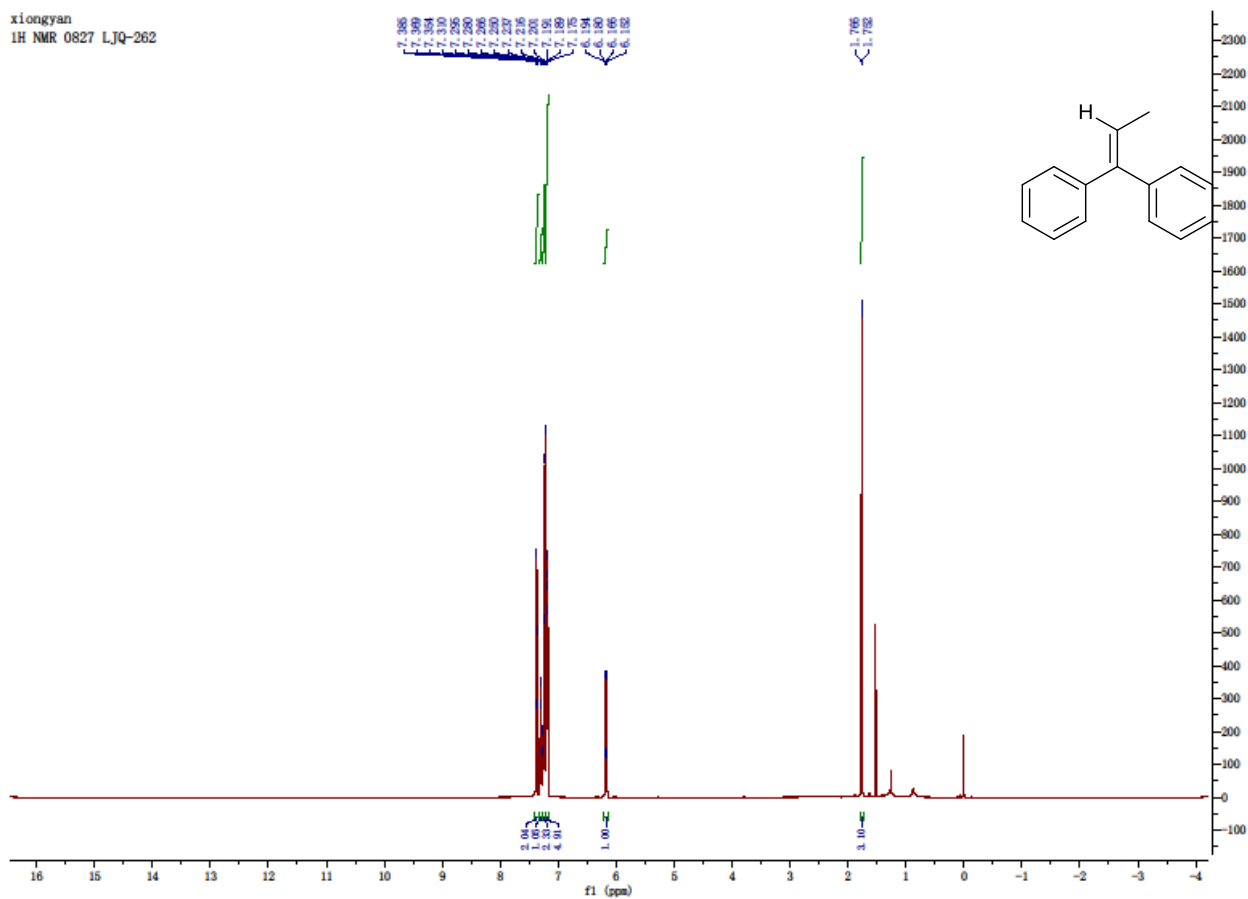

xiongyan  
13C NMR 0827 LJQ-262

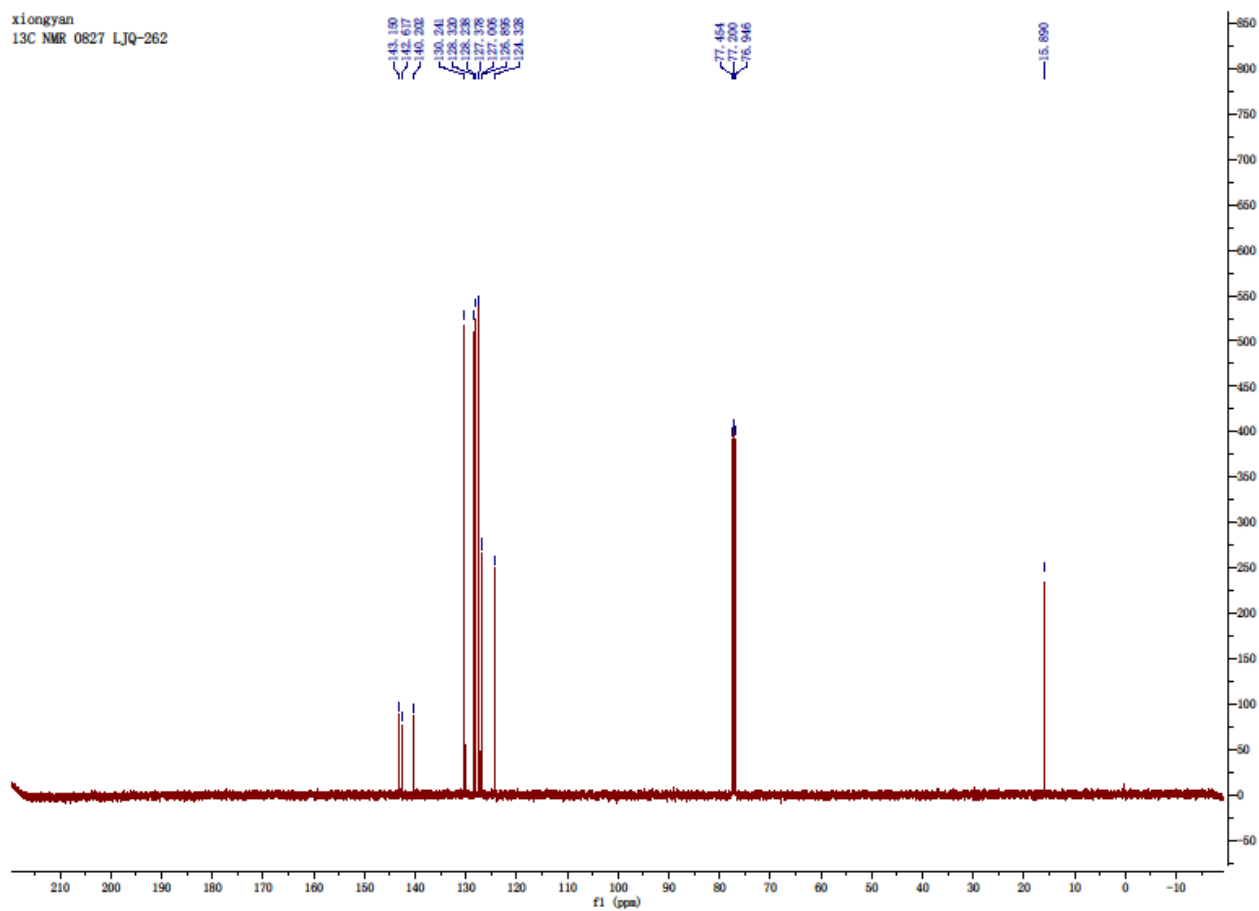

Ethene-1,1-diyl dibenzene (**2x**, 55%)

xiongyan  
1H NMR 0827 LJQ-264

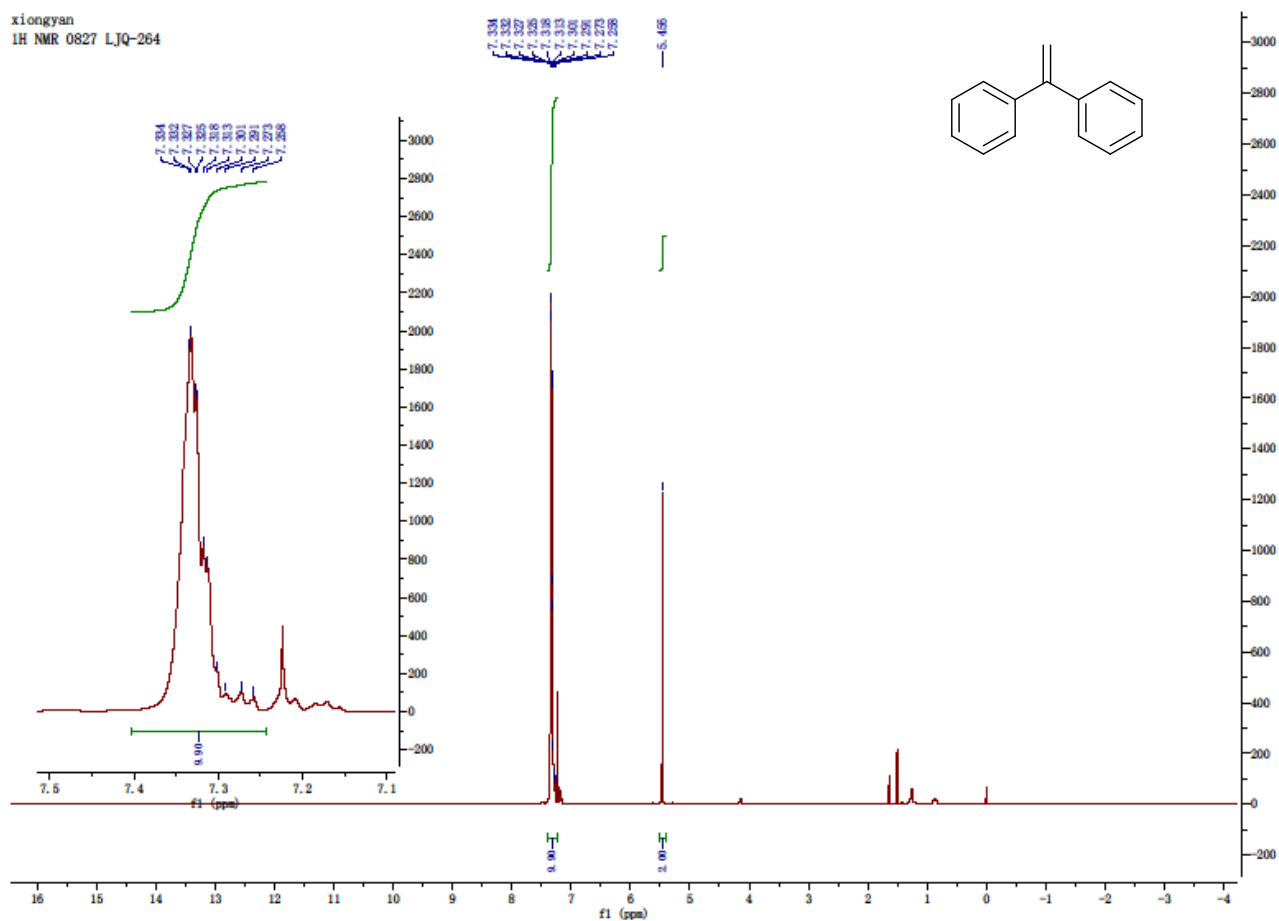

xiongyan  
13C NMR 0827 LJQ-264

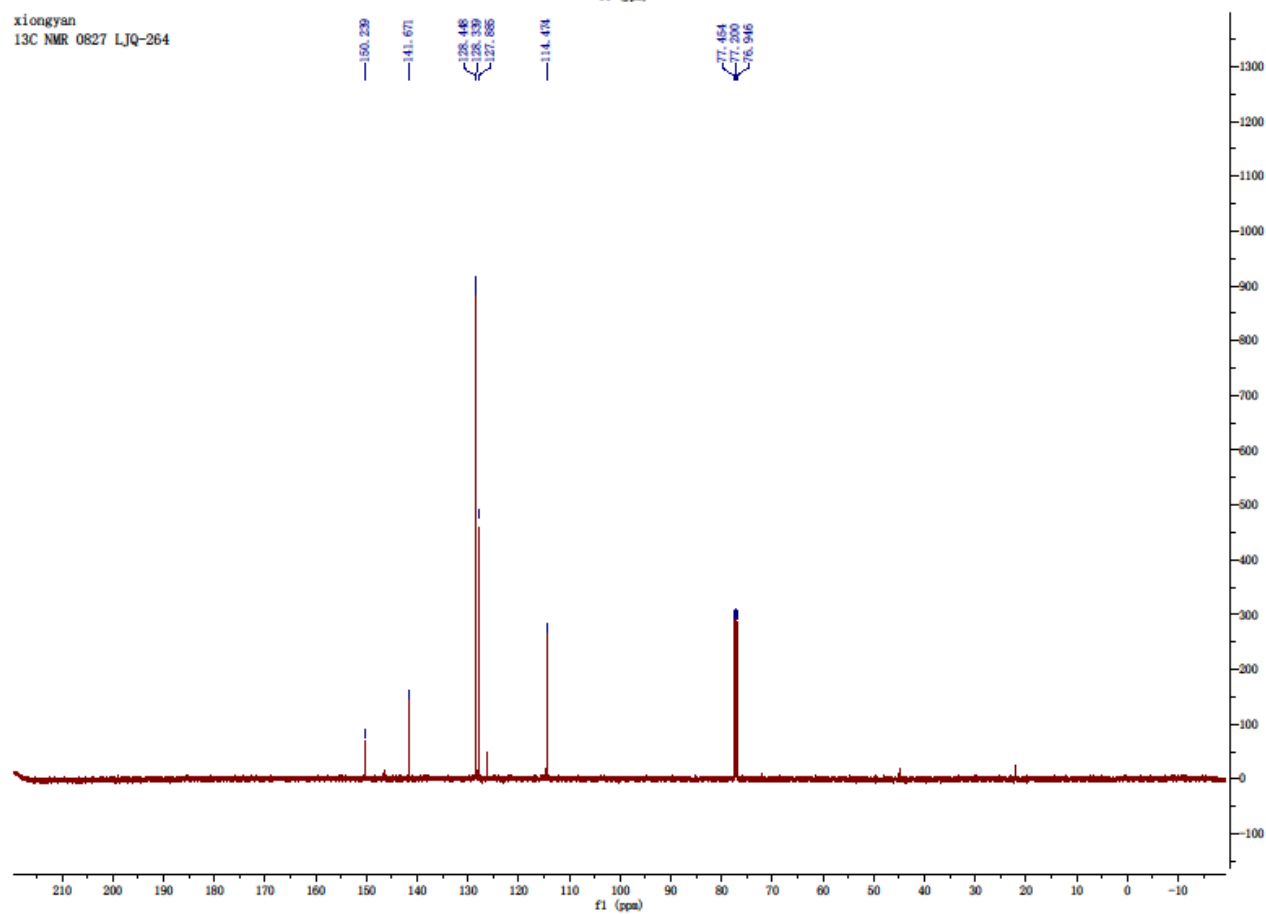

Deuterated 4-methyldiphenylmethane (**2m'**, 48%)

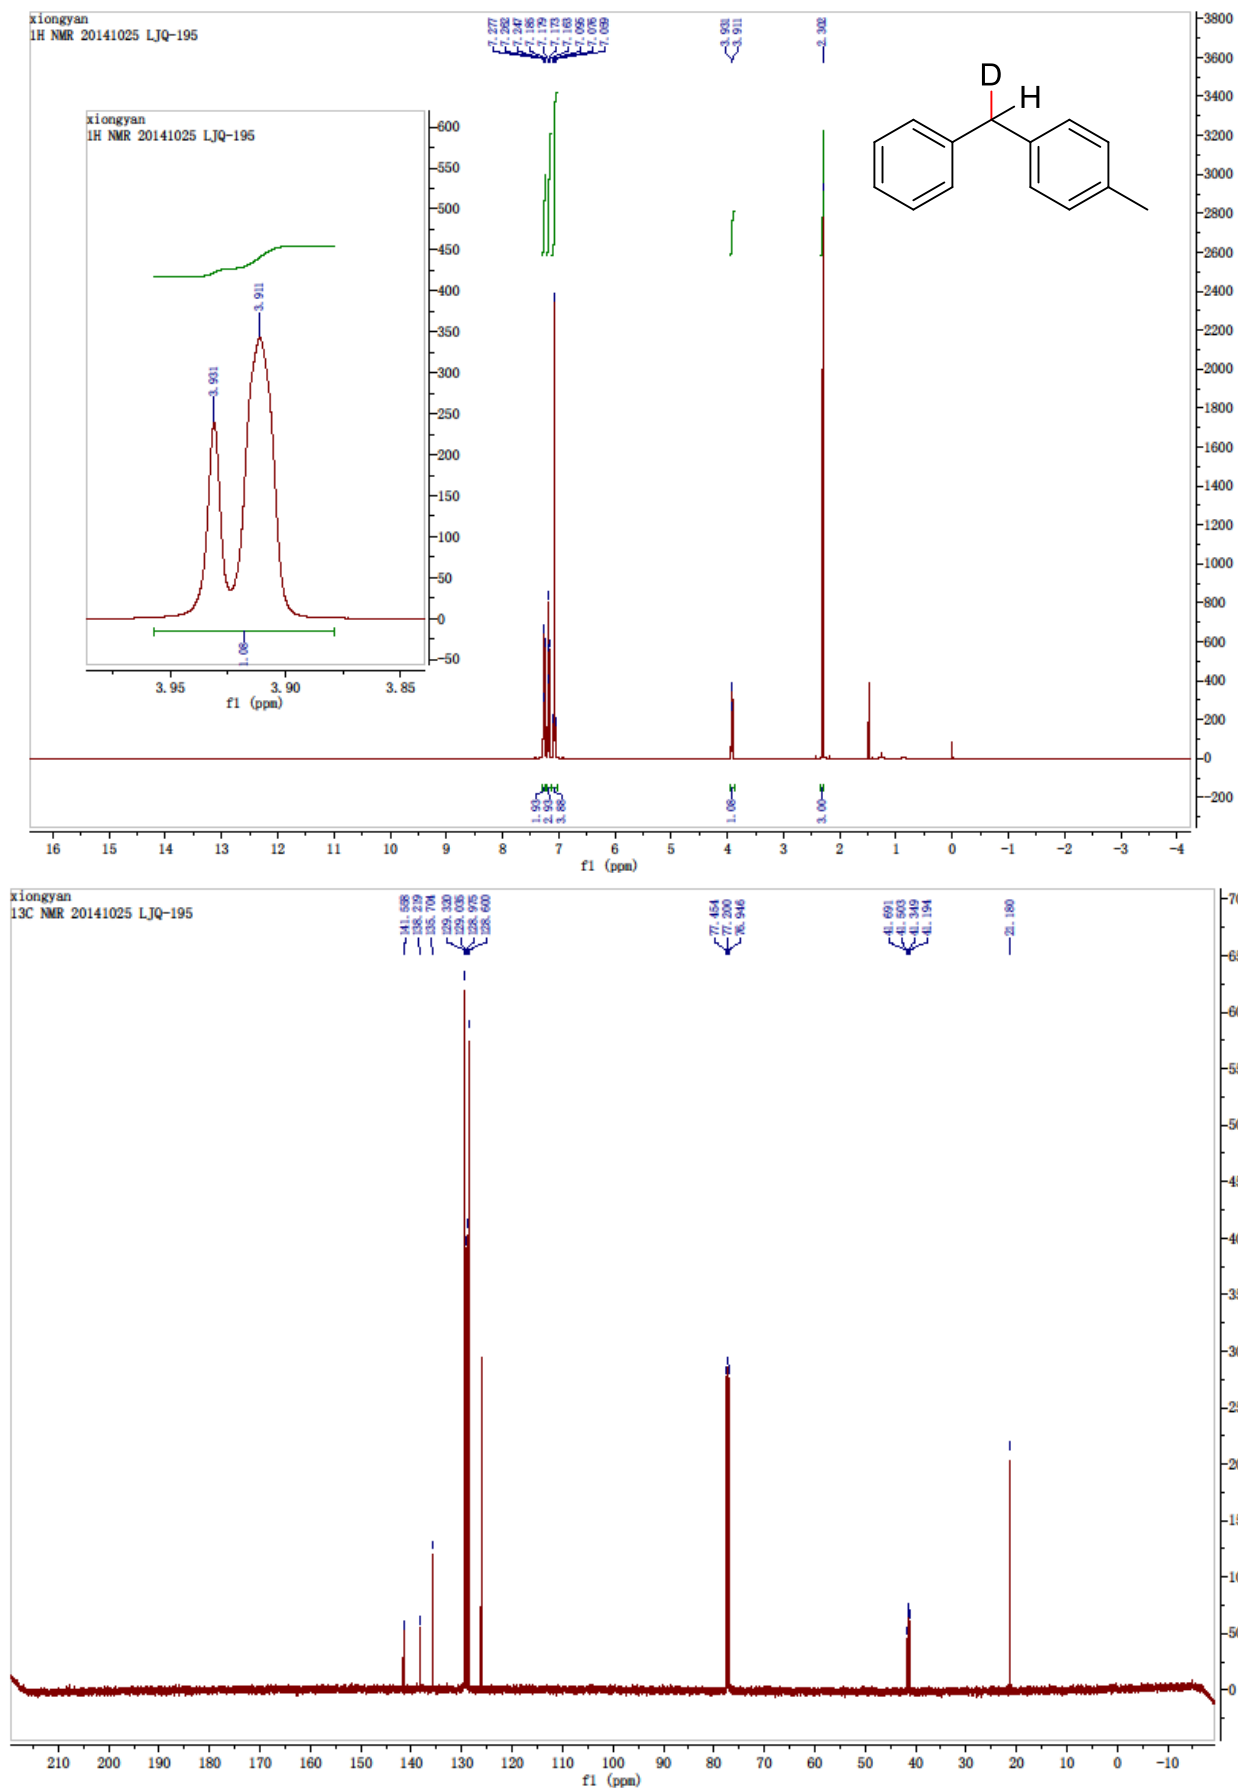



Phenyl(pyridin-4-yl)methanol (**1u**)

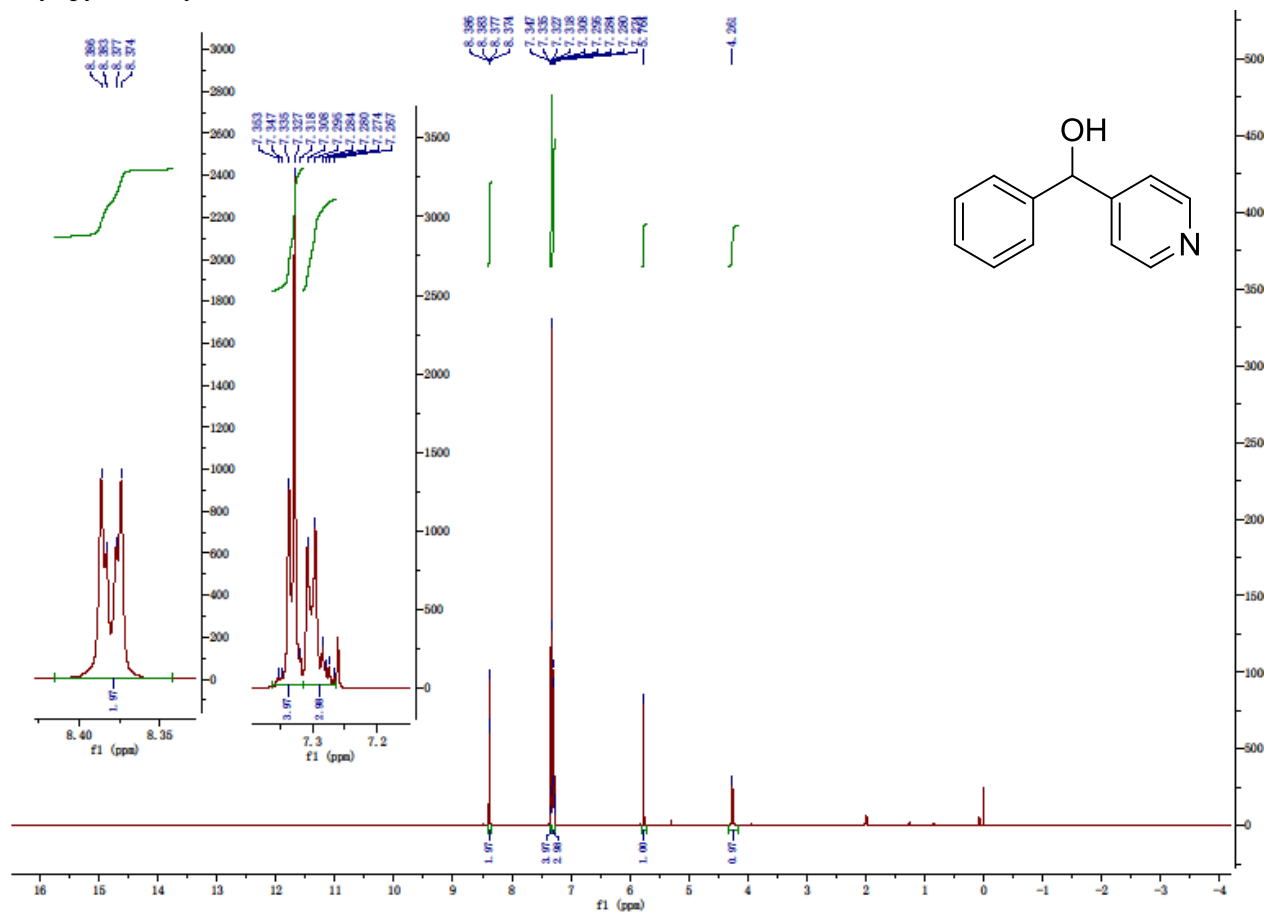

Phenyl(thiophen-2-yl)methanol (**1v**)

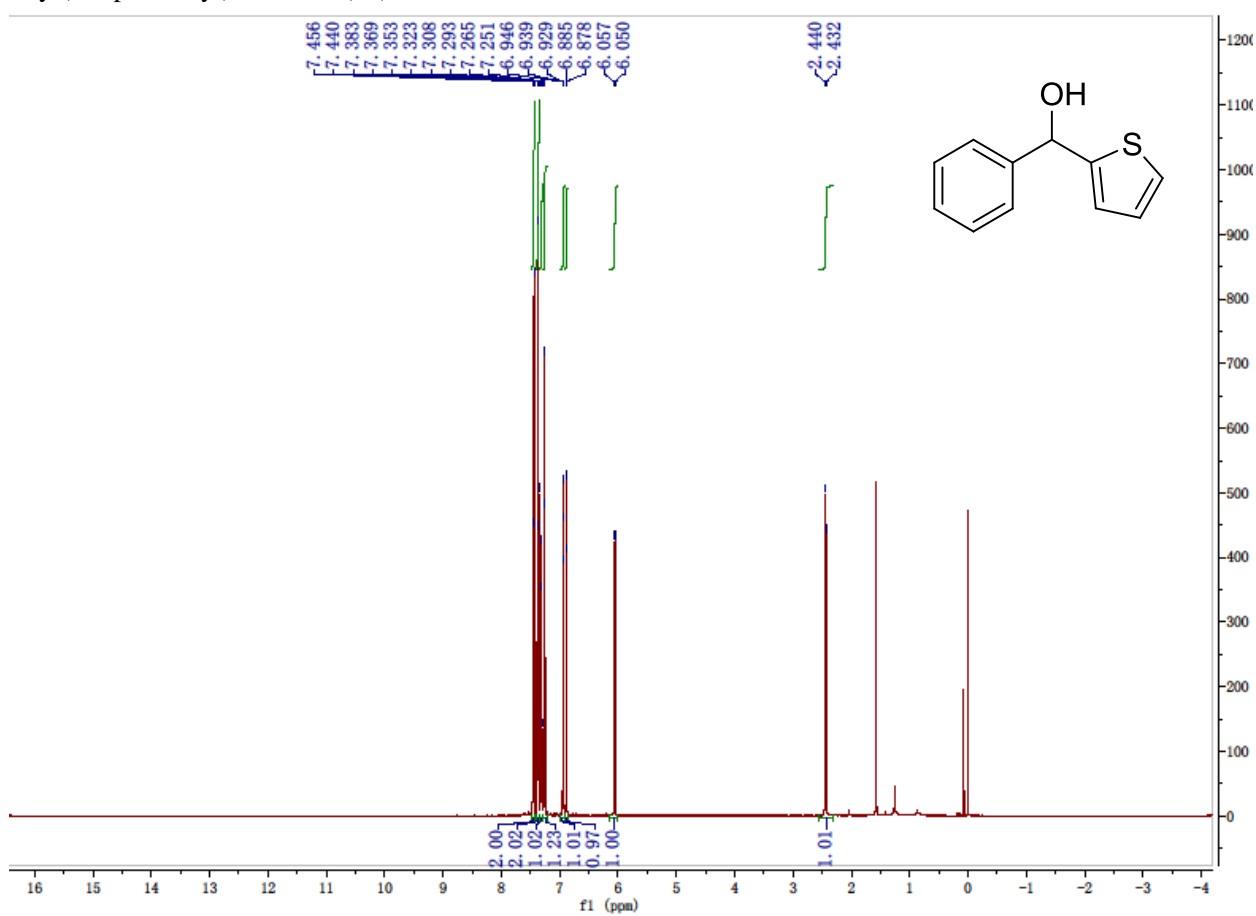

Supplement: c5ra14775a1.pdf [file c5ra14775a1.pdf]
